# 1 **Whole-Cerebrum distortion-free three-dimensional pseudo-** 2 **Continuous Arterial Spin Labeling at 7T**

3 Chenyang Zhao<sup>1</sup>, Xingfeng Shao<sup>1</sup>, Qinyang Shou<sup>1</sup>, Samantha J. Ma<sup>2</sup>, Sayim Gokyar<sup>1</sup>, Christina  
4 Graf<sup>3</sup>, Rudolf Stollberger<sup>3</sup>, and Danny JJ Wang<sup>1,4</sup>

5 <sup>1</sup>Laboratory of FMRI Technology (LOFT), Mark & Mary Stevens Neuroimaging and  
6 Informatics Institute, Keck School of Medicine, University of Southern California

7 <sup>2</sup>Siemens Medical Solutions USA, Los Angeles, California, USA.

8 <sup>3</sup>Institute of Biomedical Imaging, Graz University of Technology

9 <sup>4</sup>Department of Neurology, Keck School of Medicine, University of Southern California

## 10 **\*Corresponding Author:**

11 Danny JJ Wang, PhD, MSCE

12 Laboratory of FMRI Technology (LOFT)

13 Mark & Mary Stevens Neuroimaging and Informatics Institute

14 Keck School of Medicine

15 University of Southern California (USC)

16 E-mail: [jwang71@gmail.com](mailto:jwang71@gmail.com)

17 Telephone: +1 (310) 948 3390

18 **Word Count: 7217**

## 1 **Abstract**

2 Fulfilling potentials of ultrahigh field for pseudo-Continuous Arterial Spin Labeling (pCASL) has been hampered by  
3 B1/B0 inhomogeneities that affect pCASL labeling, background suppression (BS), and the readout sequence. This  
4 study aimed to present a whole-cerebrum distortion-free three-dimensional (3D) pCASL sequence at 7T by  
5 optimizing pCASL labeling parameters, BS pulses, and an accelerated Turbo-FLASH (TFL) readout. A new set of  
6 pCASL labeling parameters ( $G_{ave}=0.4\text{mT/m}$ ,  $G_{ratio}=14.67$ ) was proposed to avoid interferences in bottom slices  
7 while achieving robust labeling efficiency (LE). An OPTIM BS pulse was designed based on the range of B1/B0  
8 inhomogeneities at 7T. A 3D TFL readout with 2D-CAIPIRINHA undersampling ( $R=2\times 2$ ) and centric ordering was  
9 developed, and the number of segments ( $N_{seg}$ ) and flip angle (FA) were varied in simulation to achieve the optimal  
10 trade-off between SNR and spatial blurring. In-vivo experiments were performed on 19 subjects. The results showed  
11 that the new set of labeling parameters effectively achieved whole-cerebrum coverage by eliminating interferences  
12 in bottom slices while maintaining a high LE. The OPTIM BS pulse achieved 33.3% higher perfusion signal in gray  
13 matter (GM) than the original BS pulse with a cost of 4.8-fold SAR. Incorporating a moderate FA ( $8^\circ$ ) and  $N_{seg}$  (2),  
14 whole-cerebrum 3D TFL-pCASL imaging was achieved with a  $2\times 2\times 4\text{ mm}^3$  resolution without distortion and  
15 susceptibility artifacts compared to 3D GRASE-pCASL. In addition, 3D TFL-pCASL showed a good to excellent  
16 test-retest repeatability and potential of higher resolution (2 mm isotropic). The proposed technique also  
17 significantly improved SNR when compared to the same sequence at 3T and simultaneous multislice TFL-pCASL at  
18 7T. By combining a new set of labeling parameters, OPTIM BS pulse, and accelerated 3D TFL readout, we  
19 achieved high resolution pCASL at 7T with whole-cerebrum coverage, detailed perfusion and anatomical  
20 information without distortion, and sufficient SNR.

## 21 **Key words**

22 Arterial Spin Labeling (ASL), perfusion imaging, ultrahigh field, pseudo-Continuous Arterial Spin Labeling  
23 (pCASL), background suppression (BS), simultaneous multislice (SMS), Turbo-FLASH (TFL)

## 1 **1. Introduction**

2 Arterial Spin Labeling (ASL) is a non-invasive MR imaging technique permitting the  
3 quantitative measurement of cerebral blood flow (CBF) (Detre et al., 1992; Williams et al., 1992).  
4 After thirty years of research, the community has reached a consensus for the clinical  
5 implementation at 3T recommending pseudo-Continuous ASL (pCASL), background  
6 suppression (BS), and segmented three-dimensional (3D) readout (Alsop et al., 2015). As a  
7 technique inherently suffering from low signal-to-noise ratio (SNR) and limited tracer half-life,  
8 ultrahigh-field (7T) is appealing to ASL given the potential advantages of increased SNR and  
9 prolonged blood T1. At 7T, ASL has been explored by several studies with different labeling and  
10 imaging techniques, such as 2D turbo-FLASH (TFL)-pCASL (Zuo et al., 2013), 2D TFL-pCASL  
11 with simultaneous multi-slice acquisition (SMS-TFL-pCASL) (Wang et al., 2015), 2D echo-  
12 planar imaging (EPI)-pCASL (Luh et al., 2013), pulsed ASL (Wang et al., 2021), and laminar  
13 perfusion imaging with a 3D zoomed gradient and spin echo (GRASE) sequence (Shao et al.,  
14 2021). Nevertheless, 3D pCASL imaging with whole-brain coverage and high resolution remains  
15 difficult at 7T because of the following challenges.

16 The labeling efficiency (LE) of pCASL is low due to the limited coverage of transmit coil. To  
17 address this issue, placing the labeling plane at a more superior position at 7T than 3T was  
18 recommended (Zuo et al., 2013). A recent study also recommended a smaller average gradient  
19 ( $G_{ave}$ ) and slice-selective gradient ( $G_{max}$ ) of pCASL labeling to compensate for a potentially  
20 reduced B1 field at the labeling region (Meixner et al., 2022). In addition, an increased duty  
21 cycle of pCASL labeling was suggested to improve the robustness of LE to B0  
22 inhomogeneity (Wang et al., 2022). However, the combination of these modifications may  
23 produce signal interferences in bottom imaging slices because of sidebands of pCASL labeling  
24 extending into the imaging volume, which limits field-of-view (FOV) in the slice direction.

25 In addition, the utility of BS is limited by the low inversion efficiency (IE) due to B1/B0 field  
26 inhomogeneities at 7T. BS is crucial for improving temporal SNR (tSNR) and suppressing  
27 artifacts related to physiological fluctuations. At 3T, the reduction of ASL signal caused by a BS  
28 pulse is negligible (<5%) (Garcia et al., 2005), and multiple BS pulses can be applied to heavily  
29 suppress different tissues (Shao et al., 2018). At 7T, however, the use of BS, in particular

1 multiple BS pulses, may lead to a substantial loss of ASL signal. On the other hand, BS is  
2 important for segmented 3D ASL at 7T as physiological noise becomes more dominant than at  
3 3T. Consequently, a BS pulse with high IE and resistance to B1/B0 field inhomogeneities is  
4 highly desired.

5 Furthermore, workhorse readout sequences for pCASL at 3T, such as GRASE and EPI (Alsop et  
6 al., 2015), suffer from signal loss and distortion due to shortened T2/T2\* at 7T. A previous study  
7 proposed GRASE-pCASL using 12-fold acceleration to reduce TE to ~20 ms and total-  
8 generalized-variation (TGV) regularized reconstruction to improve SNR (Shao et al., 2020;  
9 Spann et al., 2020). Alternatively, TFL is a readout sequence with successful applications in  
10 structural (Marques et al., 2010) and susceptibility weighted (Bian et al., 2016) MRI at 7T due to  
11 the advantages of short TE, fast acquisition time, no or minimal distortion, and low specific  
12 absorption rate (SAR) of RF power. Comparing to the previous studies that used 2D and 2D  
13 SMS-TFL-pCASL (Wang et al., 2022, 2015; Zuo et al., 2013), 3D TFL is preferred for achieving  
14 higher resolution and SNR.

15 This work aimed to develop a distortion-free 3D pCASL sequence with whole-cerebrum  
16 coverage by combining a new set of pCASL labeling parameters, a high-performance BS pulse,  
17 and an accelerated TFL readout at 7T. Firstly, theoretical analysis and Bloch equation simulation  
18 were performed to propose an optimal set of pCASL parameters with high LE and without  
19 interferences with bottom imaging slices. Secondly, Bloch simulations were conducted to  
20 evaluate several BS pulses from which a BS pulse with superior performance was selected.  
21 Thirdly, TFL-pCASL was compared with GRASE-pCASL based on simulations, which were  
22 validated by in-vivo experiments. Moreover, the test-retest repeatability was examined. Finally,  
23 in-vivo experiments were conducted to compare the proposed technique to the same sequence at  
24 3T and SMS-TFL-pCASL at 7T.

## 1 2. Method

### 2 2.1. Optimization of pCASL labeling

3 According to (Dai et al., 2008), the pCASL pulse train is formed as the convolution of Hanning  
 4 function,  $h(t)$ , and a temporal sampling function,  $x(t)$ . Its Fourier response,  $F(z)$ , can be  
 5 derived as the multiplication of  $H(z)$  and  $X(z)$ , which are Fourier responses of  $h(t)$  and  $x(t)$ ,  
 6 respectively. The distance from the labeling plane, denoted by  $z$ , is associated with frequency  
 7 along the  $z$  gradient. Subscripts of “con” and “la” were used to indicate the control and label  
 8 conditions, respectively, for expressions throughout the paper. The signs of  $X_{con}(t)$  alternate  
 9 between positive and negative, resulting in a  $X_{con}(z)$  which is shifted half cycles from  $X_{la}(z)$ .  
 10 Expressions of the functions are described in supplement section 1.

11

#### Interferences in Labeling 0

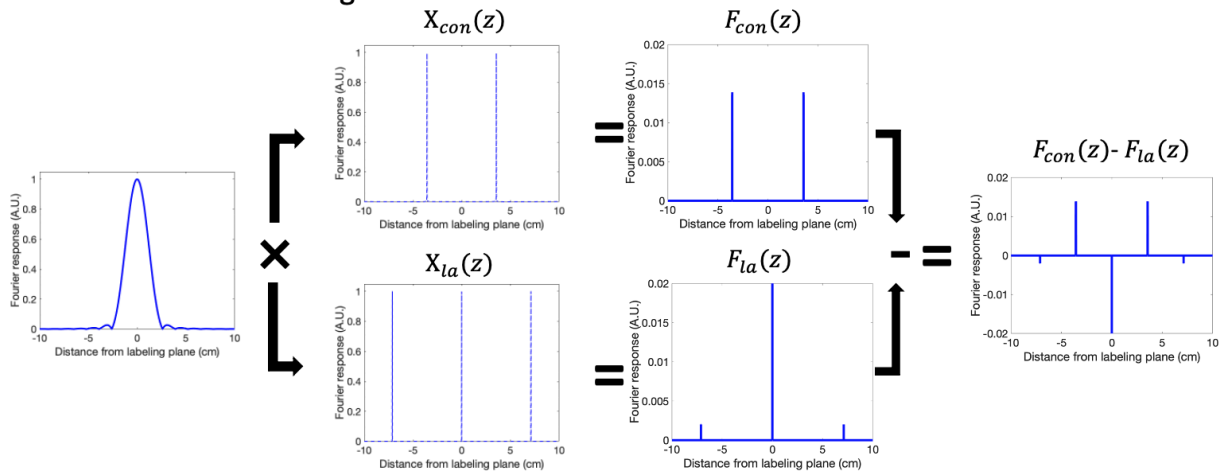

12

13 **Figure 1.** A schematic plot showing the formation of signal interferences in Labeling 0.  $H(z)$   
 14 and  $X(z)$  are Fourier responses of Hanning function,  $h(t)$ , and a temporal sampling function,  
 15  $x(t)$ , respectively. Harmonic frequency peaks of  $X(z)$  overlap with the sidelobes of  $H(z)$ , which  
 16 generates spikes in  $F(z)$  on static tissues. The differences of  $F(z)$  between the control and label  
 17 conditions may interfere with the perfusion signal.

18 Figure 1 shows the aforementioned functions with the benchmark parameter set (balanced  
 19 scheme, RF spacing ( $T$ )=550  $\mu$ s, RF duration ( $\tau$ )=300  $\mu$ s,  $G_{ave}$ =0.6 mT/m, and  $G_{max}/G_{ave}$

1 ( $G_{ratio}=10$ ), herein termed Labeling 0, that was previously optimized in (Wang et al., 2022).  
2 Spikes in  $F_{con}(z)$  appear at the off-center locations where frequency peaks of  $X_{con}(z)$  overlap  
3 with the sidelobes of  $H(z)$ . Similarly, two smaller spikes in  $F_{la}(z)$  appear at different locations.  
4 In the original implementation of pCASL at 3T, the harmonic frequency peaks of  $X(z)$  appeared  
5 at distances far enough, where negligible sidelobes of  $H(z)$  reside, to avoid the formation of  
6 spikes in  $F(z)$  within the imaging FOV. At 7T, however, the modifications for optimizing LE  
7 mentioned in the introduction may induce spikes in  $F(z)$  within FOV, thus interfering perfusion  
8 signal in  $F_{con}(z) - F_{la}(z)$ . Since  $X_{con}(z)$  generates  $\sim 10$  times stronger interferences than  $X_{la}(z)$ ,  
9 the following analysis will focus on the control condition.

10 The locations of the first frequency peak of  $X_{con}(z)$  and the zero-crossings of  $H(z)$  can be  
11 calculated as  $Z_{con}$  in Eq. 1 and  $Z_0$  in Eq. 2, respectively. A solution for removing interferences  
12 was proposed that  $G_{ratio}$  can be adjusted according to Eq. 3 to overlap the first harmonic  
13 frequency peak with a neighboring  $k^{\text{th}}$  zero-crossing. This solution enables a slight change of  
14 gradient parameters within the optimal parameter range, and also automatically addresses the  
15 small interferences caused by  $X_{la}(z)$  as  $Z_{la} = 2 Z_{con}$ . Because the first harmonic frequency peak  
16 resided within the first sidelobe of Labeling 0, two new labeling parameter sets, herein termed  
17 Labeling 1 and 2, were proposed by setting  $k = 2$  and  $3$ , respectively. Setting  $k = 1$  was  
18 prohibited due to the relatively large sidelobes around the first zero-crossing, leading to  
19 unsatisfactory suppression of interference.

20 
$$Z_{con} = \frac{1}{2\gamma G_{ave}T} \quad \text{Eq. 1}$$

21 
$$Z_0 = \frac{k+1}{\gamma G_{max}\tau} (k \in \mathbb{Z}^+) \quad \text{Eq. 2}$$

22 
$$Z_{con} = Z_0 \rightarrow G_{ratio} = \frac{2(k+1)T}{\tau} (k \in \mathbb{Z}^+) \quad \text{Eq. 3}$$

23 The above derivation is based on Fourier analysis, which ignores relaxations and is only legit in  
24 the low-tip-angle regime. To validate our analysis, we simulated  $Mz_{con}(z)$ , which denotes the  
25 longitudinal magnetization on static tissue ( $T1=1500$  ms and  $T2=50$  ms) immediately after  
26 pCASL labeling in control condition. The simulation was based on Bloch equation that modeled  
27 the RF pulses and gradients in pCASL labeling as a train of hard pulses with a step size of  $10 \mu\text{s}$   
28 (Dai et al., 2008).

1 The same simulation was repeated to optimize LE of pCASL labeling on arterial blood. Blood  
 2 T1 and T2 values were assumed as 2087 ms and 68 ms, respectively, according to  
 3 (Krishnamurthy et al., 2014; Zhang et al., 2013). LE was calculated as the average weighted by  
 4 the flow contributions of different velocities in a cardiac cycle with the assumptions of laminar  
 5 flow and the same pulsatile flow model for all feeding arteries (Zhao et al., 2017). As shown in  
 6 Fig. 2 (a), following the work by (Wang et al., 2022), optimal gradient parameters were searched  
 7 in a wide range of  $G_{\text{ave}} = [0.05:0.05:1.2]$  mT/m and  $G_{\text{ratio}} = [5:1:30]$  while fixing the other  
 8 parameters, including  $T = 550 \mu\text{s}$ ,  $\tau = 300 \mu\text{s}$ , and the nominal flip angle (FA) =  $15^\circ$ . Then, a  
 9 representative reduced B1 scaling of 0.5 and hardware limits of gradient strength = 80 mT/m and  
 10 slew rate = 200 mT/m/ms were considered. Gradient parameters that violated hardware limits  
 11 were excluded from the optimization. Potential optimal parameter sets were further analyzed in  
 12 Fig. 2 (c-e) with a wide range of B0 (-200:20:200 Hz) and B1 scaling (0.2:0.05:1.2) values and  
 13 compared to Labeling 0. The B1 and B0 ranges were determined based on a cohort including the  
 14 values in 44 inflowing arteries from 11 subjects that was described in a previous study (Wang et  
 15 al., 2022).

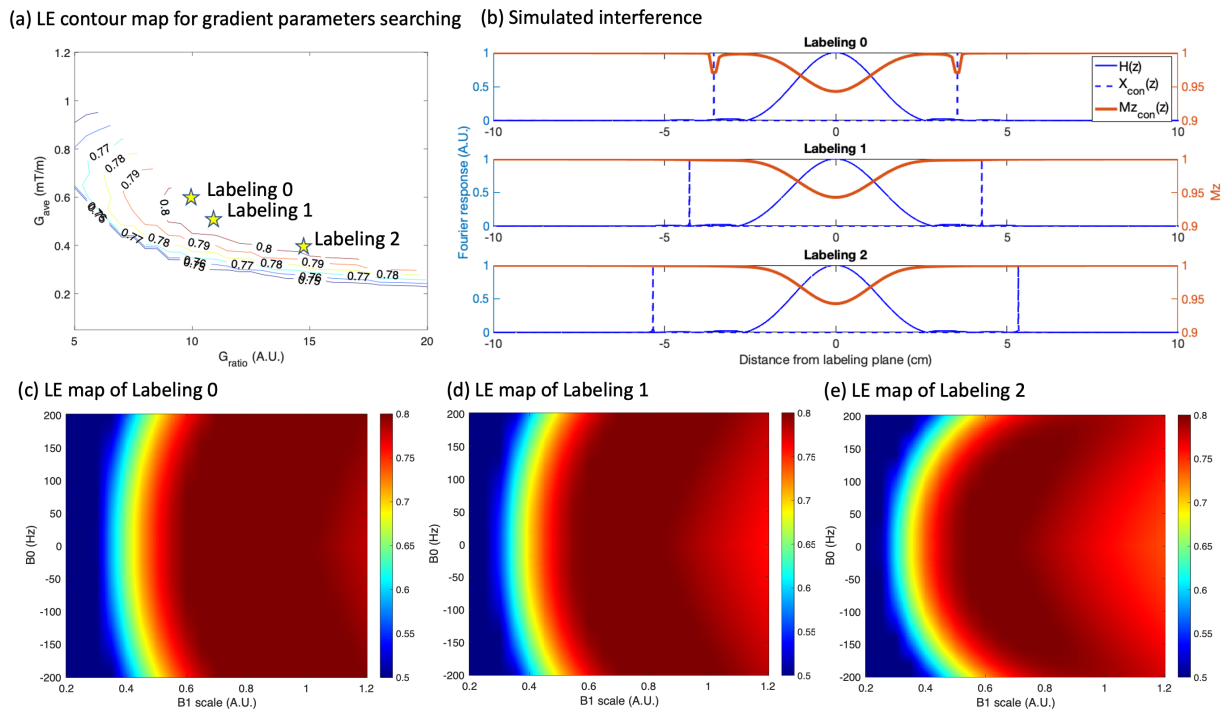

16 **Figure 2.** (a) LE contour map for gradient parameter searching. The original gradient  
 17 parameters, Labeling 0, and two new gradient parameters, Labeling 1 and 2, satisfying Eq. 3  
 18 were further analyzed. (b) Simulated interference of three pCASL labelings in the control  
 19

1 *condition. Compared to Labeling 0, the two new gradient parameters eliminate the interference*  
2 *by overlapping the first harmonic frequency peak with the zero-crossings. (c-e) Simulated LE*  
3 *maps under a range of B1 and B0 inhomogeneities. Despite of a similar average LE, new*  
4 *labeling parameters are more robust to low B1 but are slightly more sensitive to B0 offset.*

## 5 **2.2. Optimization of background suppression pulses**

6 Four non-selective inversion pulses, including two optimal control-based pulses, MATPULSE  
7 and OPTIM pulse, and two traditional adiabatic pulses, Hyperbolic Secant (HS) and wideband  
8 uniform rate smooth truncation (WURST), were optimized and evaluated for the highest mean IE  
9 averaged across B0 offsets ( $\pm 250$  Hz) and B1 scalings (0.35-1.15). The optimization ranges were  
10 determined based on the B1 and B0 values in the pCASL imaging volume measured from a  
11 cohort of 9 subjects (see supplement section 2). Note IE was defined as  $-M_z(t)/M_z(0)$ , where  
12  $M_z(t)$  and  $M_z(0)$  represents the longitudinal magnetization before and after inversion (Garcia et  
13 al., 2005).  $M_z(t)$  was assumed to be negative and was set to 0 when a positive value occurs.

14 MATPULSE was initially designed for BS at 3T (3T pulse) using open-source software (Matson,  
15 1994) with parameters of pulse duration = 10.24 ms, bandwidth = 1000 Hz, and peak amplitude  
16 = 10  $\mu$ T. To adapt MATPULSE to the greater field inhomogeneities at 7T, the MATPULSE  
17 pulse was optimized based on parameter searching strategy by stretching pulse duration from 5  
18 to 20 ms and peak amplitude from 5 to 20  $\mu$ T. For HS and WURST, according to the definitions  
19 (see supplement section 3) (Kupce and Freeman, 1995; Silver et al., 1984), the parameter  
20 searching was expanded to include more pulse-specific parameters, such as  $\mu$  (200-1000) and  $\beta$   
21 (2-7) for HS and  $n$  (1-20) and  $k$  (250-1000) for WURST.

22 The OPTIM pulse was designed by means of ensemble-based time optimal control (Graf et al.,  
23 2022; Rund et al., 2018). Such a design alleviates the IE loss caused by the T2 relaxation during  
24 the pulse, and, thus, may achieve high performance at 7T. Detailed information can be found in  
25 supplement section 4. For the initialization of the optimization, random values of the RF pulse  
26 were assumed with a pulse duration of 10 ms. The box constraint of the RF amplitude was set to  
27 20  $\mu$ T. B1 and B0 ranges were slightly extended to 30-115% and  $\pm 280$  Hz, respectively, in pulse  
28 design to achieve desirable performance in the target ranges, which were consistent with those of  
29 other pulses. The lower limit for B1 robustness was rather difficult to realize. Therefore, for a



1 range of scales of 40% to 115%, the variable  $\epsilon$  (see supplement section 4), which determines  
 2 inversion quality, was set to 0.05, but increased to 0.1 for a range of 30% to 40%.

3 SAR levels were calculated as the time integral of the squared RF amplitudes, which was  
 4 determined by pulse type, duration, maximum amplitude, and pulse-specific parameters. Relative  
 5 SAR was calculated as the ratio of SAR of each pulse to that of 3T pulse. Pulses with different  
 6 shapes were sorted by their relative SAR levels and shown in Fig. 3(a). For each pulse type, the  
 7 parameter sets produced a lower mean IE at higher SAR levels were excluded.

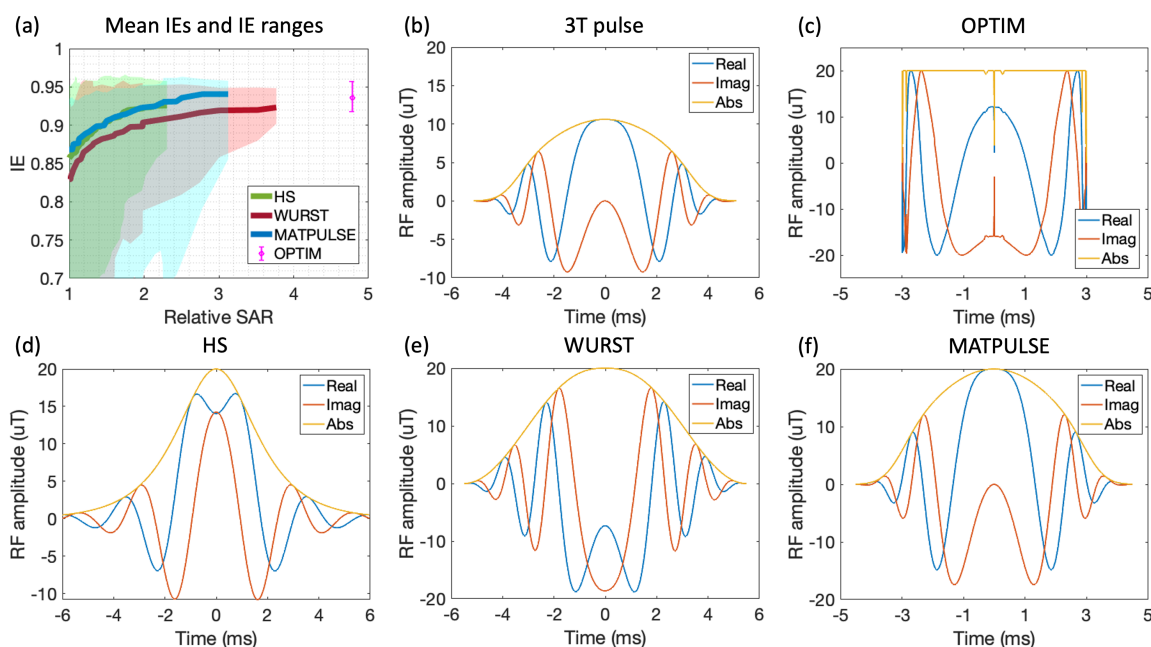

8

9 **Figure 3.** (a) Simulated IE of OPTIM and 3 BS pulses with different pulse-specific parameters  
 10 and different relative SAR levels. The baseline of SAR levels was set by 3T pulse. The shaded  
 11 area represents the IE range within the ranges of B1 scaling and B0 offset empirically defined at  
 12 7T. (b-f) 3T pulse and optimized inversion pulses for 7T. It was difficult to achieve a satisfying  
 13 performance at a SAR level comparable to the 3T pulse. Among four pulses, OPTIM achieved  
 14 the highest mean IE and min IE with a cost of 4.8-fold SAR. HS, WURST, and MATPULSE  
 15 achieved their highest mean IE at relative SAR levels of 2.3, 3.7, and 3.1, respectively.

### 1 2.3. Optimization of 3D readout

2 As modeled by (Zuo et al., 2013), TFL-based perfusion signal  $\Delta S$  at the  $j^{\text{th}}$  excitation can be  
 3 described by Eq. 4,

$$4 \quad \Delta S = \Delta M (e^{\frac{-TR}{T_{1,blood}}} \cos\theta)^{j-1} e^{\frac{-TE}{T_{2,blood}}} \sin\theta \quad \text{Eq. 4}$$

5 where  $\theta$  is a small FA ( $<20^\circ$ ), and  $\Delta M$  is the difference in longitudinal magnetization between  
 6 label and control conditions at the start of the readout, which is related to physiological  
 7 parameters, such as CBF and arterial transit time (ATT), and sequence parameters, such as  
 8 labeling duration (LD) and post labeling delay (PLD). The model assumes the signal decays only  
 9 with the T1 of blood, and indicates that the TFL-based perfusion signal decreases as more  
 10 excitations/encoding-steps are applied and that the signal decays faster with a greater FA. Centric  
 11 ordering was employed for phase encoding (PE) and partition directions to maximize SNR and  
 12 flow contrast. Given  $j = 1$ , the signal acquired at the k-space center is  $\Delta M e^{\frac{-TE}{T_{2,blood}}} \sin\theta$ .  
 13 Consequently, the SNR of a  $\Delta M$  map increases linearly with larger FA. On the other hand, the  
 14 reduced signals in peripheral k-space may introduce image blurring. PE was looped inside the  
 15 partition loop to avoid in-plane smoothness, and acceleration methods, including segmented  
 16 readout and undersampling, were implemented to minimize through-plane blurring. 2D-  
 17 CAIPIRINHA (Breuer et al., 2006) was implemented in TFL-pCASL sequence to minimize  
 18 aliasing artifacts. Fig. 4 (a) illustrates the k-space sampling pattern and the change of perfusion  
 19 signals during data acquisition.

20 As a comparison, GRASE-based perfusion signal  $\Delta S_{GRASE}$  at  $k^{\text{th}}$  spin echo and  $l^{\text{th}}$  gradient echo  
 21 can be described by Eq. 5,

$$22 \quad \Delta S_{GRASE} = \begin{cases} \Delta M \cdot EPG(k) \cdot e^{-ES|l-\frac{n+1}{2}|(R2+R2')} & l \geq \frac{n+1}{2} \\ \Delta M \cdot EPG(k) \cdot e^{-ES|l-\frac{n+1}{2}|(R2'-R2)} & \text{otherwise} \end{cases} \quad \text{Eq. 5}$$

23 where  $n$  is EPI factor (odd number only),  $ES$  is the echo spacing in EPI,  $R2=1/T2$ ,  $R2'=1/T2^*$ -  
 24  $1/T2$ , and  $EPG(k)$  is the simulated  $k^{\text{th}}$  spin echo signal using extended phase graphs (EPG) (Carr-  
 25 Purcell-Meiboom-Gill (CPMG) and FA of  $120^\circ$ ) (Hargreaves, 2022; Weigel, 2015). The  
 26 perfusion signal decays quickly due to short T2 and T2\* at 7T, which requires a fast acquisition.

1 As shown in Fig. 4 (b), a single shot GRASE sequence was accelerated by a time-dependent 2D-  
2 CAIPIRINHA R-fold undersampling (Spann et al., 2020). The sequence consisted of an integer  
3 multiple of R label/control pairs, in which the k-space samples were interleaved within every R  
4 pairs. A joint reconstruction of R label/control pairs yielded R individual  $\Delta M$  maps with reduced  
5 aliasing artifacts, as TGV-regularization improves SNR by exploiting temporal-spatial  
6 smoothness (Spann et al., 2017).

7 Point spread function (PSF) and associated full width half max (FWHM) of a  $\Delta M$  map were  
8 simulated for TFL-pCASL as a function of FA and the number of segments ( $N_{\text{seg}}$ ) based on the  
9 signal evolution described in Eq. 4, the sampling fashions stated above, and the same imaging  
10 parameters as in-vivo scans presented in section 2.4. For comparison, the simulation was  
11 repeated for GRASE-pCASL using the in-vivo imaging parameters shown in section 2.4. In  
12 addition to T1 and T2 of arterial blood mentioned in section 2.1, T2\* of 30 ms (Peters et al.,  
13 2007) was also assumed. The amplitudes of PSFs were normalized by SNR, taking into account  
14 the signal intensity acquired at the k-space center, bandwidth, and undersampling rate (R). Effect  
15 of regularization in image reconstruction was not considered.

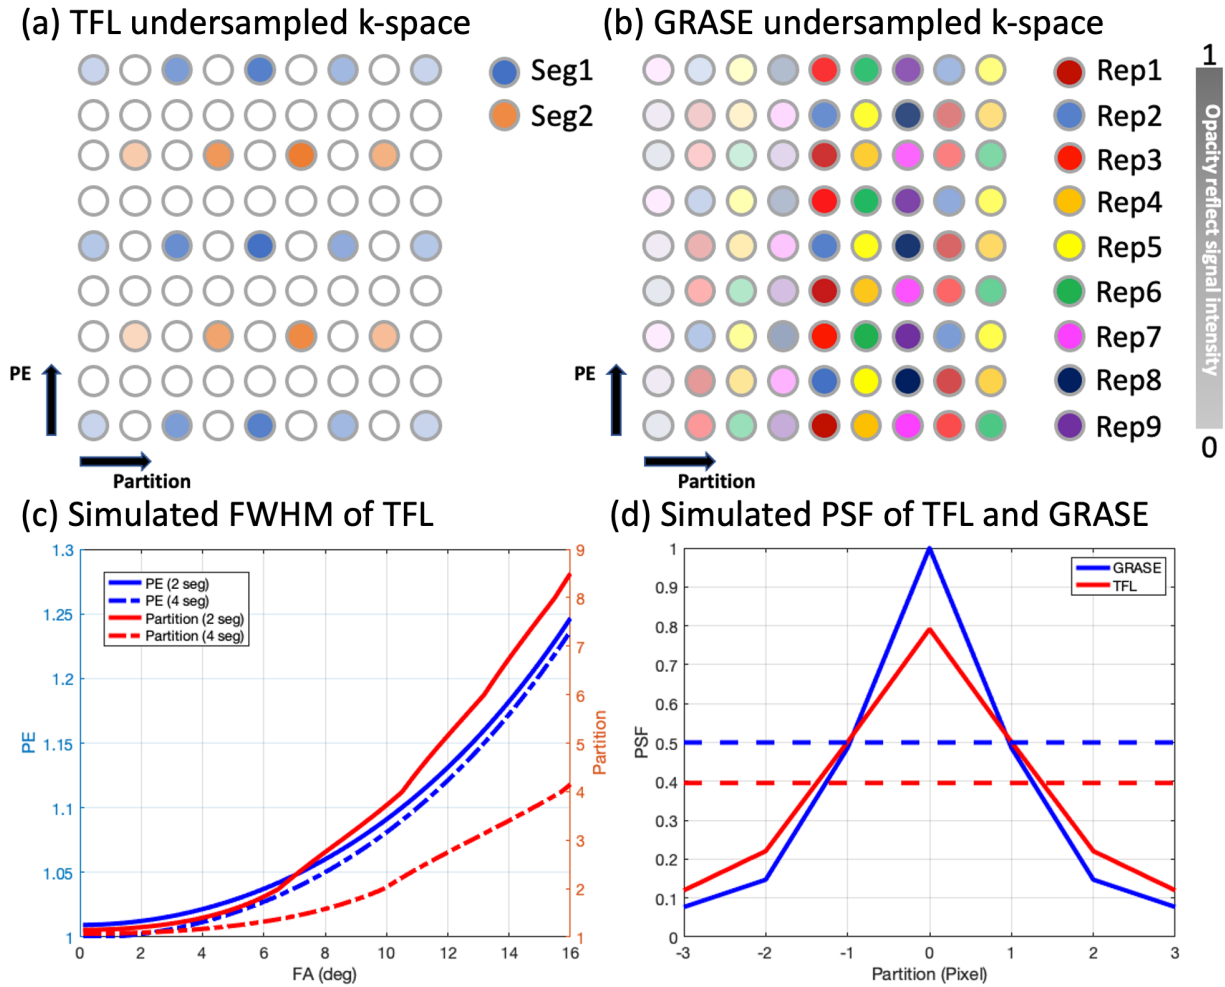

1  
2 **Figure 4.** (a, b) *k*-space undersampling pattern of TFL-pCASL and GRASE-pCASL. The opacity  
3 change indicates the decay of the perfusion signal. TFL-pCASL was accelerated by 2 segments  
4 and 2D-CAIPIRINHA undersampling with  $R=2 \times 2$ . The single shot GRASE-pCASL was  
5 undersampled by time-dependent 2D-CAIPIRINHA with  $R=3 \times 3$ . 9 repetitions of control/label  
6 pairs have interleaved *k*-space samples. (c) FWHM estimated from the simulation of PSF with  
7 varying FAs and  $N_{seg}$ s. Blurring was minimal in the PE direction but increased with increased  
8 FA and decreased the number of segments in the partition direction. (d) Simulated PSFs of  
9 GRASE and TFL. The amplitudes of PSFs reflect SNR of two methods. PSF of GRASE-pCASL  
10 showed a 20% higher SNR and 0.7 pixels narrower width than that of TFL-pCASL.

## 1 **2.4. In-vivo Experiments**

2 TFL-pCASL was performed with a bandwidth of 490 Hz/pixel to maximize SNR while  
3 maintaining a short TE of 1.5 ms and echo spacing (ES) of 4 ms. For each subject, T1w images  
4 were acquired by using product MP2RAGE sequence, and time-of-flight (TOF) angiography  
5 images were acquired to place the labeling plane at the C1 segment (Bouthillier classification) of  
6 the internal carotid arteries (see supplement section 5). pCASL labeling parameters were:  
7 balanced scheme,  $T = 550 \mu\text{s}$ ,  $\tau = 300 \mu\text{s}$ ,  $G_{\text{ave}} = 0.4 \text{ mT/m}$ , and  $G_{\text{ratio}} = 14.67$ , nominal FA = 15°,  
8 LD = 1 s, PLD = 2 s. Two OPTIM BS pulses were applied at 427 and 1530 ms after labeling to  
9 suppress static tissue signals ( $T_1 = 1\text{-}2 \text{ s}$ ) to 10% at the beginning of the readout. Other imaging  
10 parameters were: resolution =  $2 \times 2 \times 4 \text{ mm}^3$ , FOV =  $224 \times 192 \times 112 \text{ mm}^3$ , matrix size =  $112 \times 96 \times 28$   
11 including 4 oversampled slices, 2D-CAIPIRINHA with  $R=2 \times 2$ ,  $N_{\text{seg}} = 2$ , FA = 8°, readout  
12 duration = 1344 ms, effective TR ( $\text{TR}_{\text{eff}}$ ) = 7 s (2.6 s dead time (TD)), 50 measurements,  
13 including an M0 image, acquired in 11 mins 40 s. A fully sampled calibration scan was acquired  
14 separately without undersampling in 20 s for estimation of GRAPPA weights. Unless otherwise  
15 stated, the parameters in this protocol were used as default.

16 Single slice 2D TFL sequences with and without a BS pulse were used to obtain whole brain IE  
17 maps of the BS pulses in axial, sagittal, and coronal views (see supplement section 6). The  
18 imaging parameters were: resolution =  $2.2 \times 3 \text{ mm}^2$ , FOV =  $210 \times 192 \text{ mm}^2$ , slice thickness = 5 mm,  
19 matrix size =  $96 \times 48$ , linear ordering, 6/8 partial Fourier, slice thickness = 5 mm, FA = 8°, TE = 1.38  
20 ms, ES = 3.3 ms, readout duration = 150 ms, and  $\text{TR}_{\text{eff}} = 10 \text{ s}$  that allows a full relaxation.

21 GRASE-pCASL was performed using the same pCASL labeling and BS scheme as TFL-pCASL.  
22 The imaging parameters were: resolution =  $2.1 \times 2.1 \times 4 \text{ mm}^3$ , FOV =  $200 \times 200 \times 120 \text{ mm}^3$ , matrix  
23 size =  $112 \times 93 \times 30$  including 6 oversampled slices, bandwidth = 2170 Hz/pixel, ES = 0.53 ms, TE  
24 = 22 ms, 2D-CAIPIRINHA with  $R=3 \times 3$ , EPI factor = 31, turbo factor = 10, single shot, FA = 120°,  
25 readout duration = 220 ms,  $\text{TR}_{\text{eff}} = 8 \text{ s}$  (TD = 4.7 s), 63 measurements, including an M0 image,  
26 were acquired in 8 min 40 s. The imaging parameters were chosen to best match those of TFL-  
27 pCASL as well as to balance TE and required number of spin echoes according to our previous  
28 study (Shao et al., 2020).

1 SMS-TFL-pCASL was compared to 3D TFL-pCASL with the default protocol. SMS-TFL-  
2 pCASL used the same labeling parameters as 3D TFL-pCASL, and the following imaging  
3 parameters: resolution =  $2 \times 2 \times 4 \text{ mm}^3$ , FOV =  $224 \times 192 \times 100 \text{ mm}^3$ , matrix size =  $112 \times 72 \times 25$ , 6/8  
4 partial Fourier along PE, linear ordering (k-space center was acquired at the 24<sup>th</sup> excitation),  
5 bandwidth = 490 Hz/pixel, no slice gap, ES=3.3 ms, SMS slice group acquisition = 245 ms, SMS  
6 factor = 5, 1/4 FOV shift, FA =  $8^\circ$ , TR<sub>eff</sub> = 4.3 s (TD = 0 s), no BS, 122 measurements, including  
7 an M0 image, acquired in 8 mins 45 s. TR<sub>eff</sub> of 3D TFL-pCASL in this comparison was  
8 shortened to 5.2 s (TD = 0.9 s) to match the total scan time.

9 Comparison experiment of 7T and 3T was conducted using the default TFL-pCASL protocol  
10 with adjustments. At 3T, a commonly used set of balanced pCASL parameters include T = 920  
11  $\mu\text{s}$ ,  $\tau = 500 \mu\text{s}$ , G<sub>ave</sub> = 0.6 mT/m, G<sub>ratio</sub> = 10, LD = 1.8 s, PLD = 2 s, and a fixed labeling plane  
12 that is 90 mm away from the imaging center. Other changes at 3T included adjusted BS timing at  
13 60 and 1500 ms following label, shortened TR<sub>eff</sub> = 5.2 s (TD = 0 s), and total scan time = 8 min  
14 40 s. At 7T, TR<sub>eff</sub> was adjusted to the shortest possible value (on average 5.6 s) for each subject  
15 based on the maximal allowed SAR.

16 There were eight MRI experiments to evaluate: 1) 3 labeling parameter sets (3 subjects), 2) BS  
17 pulses (1 subject), 3) N<sub>seg</sub> of 2 and 4 (same acquisition time, 1 subject), 4) FA of 4, 8, and  $12^\circ$  (1  
18 subject), 5) comparison of TFL- and GRASE-pCASL (3 subjects), 6) test-retest repeatability of  
19 TFL- and GRASE-pCASL (1 day apart, 5 subjects), 7) comparison of 3D TFL- and 2D SMS-  
20 TFL-pCASL (1 subject), 8) comparison of 3T and 7T (5 subjects)

21 In total, nineteen healthy subjects (8 females,  $28.1 \pm 5.0 \text{ y/o}$ ) underwent MRI experiments on the  
22 investigational pTx part of a 7T Terra system (Siemens Medical Systems, Erlangen, Germany)  
23 with an 8Tx/32Rx head coil (Nova Medical, Cambridge, MA, USA) on the first level of SAR,  
24 and a 3T Prisma system (Siemens Healthineers, Erlangen, Germany) using a 32-channel head  
25 coil under the approval of a local IRB. All subjects provided written informed consents. At 7T,  
26 the RF-shimming mode was TrueForm (Nistler et al., 2007), which uses  $45^\circ$  phase increment for  
27 each adjacent transmit channel to mimic the single transmit circularly polarized (CP) coil. B0-  
28 shimming was performed over the imaging volume with an extended lower boundary to include  
29 labeling plane (see supplement section 5).

## 1 2.5. Data analysis

2 All numerical simulations and optimizations were performed in MATLAB (The Mathworks Inc.,  
 3 Natick, USA). An in-house GUI-based toolbox was also developed in MATLAB for offline  
 4 image reconstruction of TFL-pCASL. GRAPPA (Griswold et al., 2002) with a kernel size of  
 5  $7 \times 4 \times 2$  was adapted for 2D-CAIPIRINHA undersampling pattern for image reconstruction. For  
 6 GRASE-pCASL, an open-source toolbox (“<https://github.com/IMTtugraz/AVIONIC>,” 2022;  
 7 Schloegl et al., 2017) was used for TGV-regularized reconstruction with default parameters  
 8 ( $\frac{\alpha_1}{\alpha_0} = \frac{1}{\sqrt{3}}$ ,  $w=0.9$ , and  $\beta=7$ ) and  $\lambda = 10$  as suggested by (Spann et al., 2020). M0 and label/control  
 9 images of GRASE-pCASL were reconstructed separately. SMS-TFL-pCASL images were  
 10 reconstructed offline using an in-house MATLAB toolbox of Slice-GRAPPA with  $3 \times 3$  kernel  
 11 (Setsompop et al., 2012).

12 Cerebral blood flow (CBF) was quantified using the single-compartment kinetic model adapted  
 13 for TFL-pCASL by (Zuo et al., 2013) as described in Eq. 6,

$$14 \quad CBF = \frac{6000\lambda \cdot \Delta M \cdot e^{\frac{PLD}{T_{1,blood}}} [(E_1 \cos(FA))^{j-1} + (1-E_1) \frac{1-(E_1 \cos(FA))^{j-1}}{1-E_1 \cos(FA)}]}{2\alpha \cdot T_{1,blood} \cdot M_0 (1 - e^{-\frac{LD}{T_{1,blood}}}) (E_1 \cos(FA))^{j-1}} \quad [ml/100g/min] \quad \text{Eq.6}$$

15 where  $E_1 = e^{-\frac{TR}{T_{1,blood}}}$ ,  $j$  was set to 1 for centric ordering,  $\lambda$  is the brain/blood partition coefficient,  
 16 which was assumed as 0.9 ml/g,  $\alpha$  ( $=LE \cdot IE^2$ ) is the labeling efficiency. The definitions and  
 17 values of other parameters were as defined above. For GRASE-pCASL, the standard pCASL  
 18 single-compartment kinetic model was used (Alsop et al., 2015). At 3T, LE and IE of BS were  
 19 assumed as 0.85 and 0.95, respectively, resulting in a  $\alpha = 0.76$  according to (Alsop et al., 2015).  
 20 At 7T, 70%  $\alpha$  at 3T was assumed for  $\alpha$  at 7T based on our 3T and 7T comparison results  
 21 presented in section 3.6.

22  $\Delta M$  maps were obtained by subtracting label images from control images. SNR was evaluated as  
 23 the ratio of the mean to the spatial noise standard deviation (SD) of the  $\Delta M$  maps. According to  
 24 (Feinberg et al., 2013), the spatial noise SD was calculated from a difference image obtained by  
 25 subtracting the average of all odd-indexed  $\Delta M$  maps from the average of all even-indexed  $\Delta M$   
 26 maps. tSNR was evaluated as the mean ratio of the mean to the temporal noise SD across all

1 repetitions of  $\Delta M$  maps on each voxel. Through-plane blurring of a  $\Delta M$  map was quantified  
2 using blur quality metric (BQM) (Crete et al., 2007), which is a value between 0 and 1, and a  
3 larger value indicates an image is more blurred. Test-retest repeatability was evaluated using  
4 within-subject coefficient of variance (wsCV) (Bland and Altman, 1996) and intraclass  
5 correlation coefficient (ICC) (McGraw and Wong, 1996) based on average CBF values of five  
6 subjects.

7 GM, WM, and brain masks were segmented on T1w images using SPM12 (The Wellcome  
8 Centre for Human Neuroimaging, UCL Queen Square Institute of Neurology, London, UK). For  
9 all comparison studies, T1w images and associated masks were individually coregistered to ASL  
10 images acquired with different methods.  $\Delta M$ , SNR, tSNR, and BQM were measured in brain  
11 masks, while  $\Delta M/M_0$ , CBF, wsCV, and ICC in individual masks were reported. Measurements  
12 including multiple subjects were reported in the form of mean  $\pm$  SD across subjects. In  
13 comparison of TFL- and GRASE-pCASL, SNR measurements of GRASE-pCASL were  
14 corrected to match the acquisition time of TFL-pCASL.

## 15 **3. Result**

### 16 **3.1. Optimization of pCASL labeling**

17 Figure 2 (a) shows the simulation result of LE contour map. The LE contour was open-ended in  
18 the top right corner because of exceeded slew rate. According to the contour map, two  
19 candidates, Labeling 1 ( $G_{ave} = 0.5$  mT/m and  $G_{ratio} = 11$ ) and Labeling 2 ( $G_{ave} = 0.4$  mT/m and  
20  $G_{ratio} = 14.67$ ), that conformed to the requirement defined in Eq. 3 were selected from a set of  
21 optimal parameters achieving LE greater than 0.8.

22 Figure 2 (b) show  $H(z)$  (solid blue),  $X_{con}(z)$  (dotted blue), and  $Mz_{con}(z)$  (red).  $Mz_{con}(z)$  was  
23 expected to follow the profile of  $1-F_{con}(z)$  because  $F_{con}(z)$  represent excitation profile in  
24 transverse plane. Interferences in Labeling 0 were eliminated by exactly placing  $Z_{con}$  at the  
25 second and third  $Z_0$ . Although the interferences only led to a magnetization difference of 0.03 on  
26 static tissue, the perfusion signal, typically less than 1% of the tissue signal, can still be  
27 overwhelmed. Between Labeling 1 and 2, the latter showed better suppression of interferences.



1 Figure 2 (c-e) characterize the LE of two candidate parameter sets in the presence of B1/B0 field  
2 inhomogeneities. From Labeling 0, 1 to 2, the decreasing  $G_{ave}$  improved the robustness of LE to  
3 low B1, while the increasing  $G_{ratio}$  increased the sensitivity of LE to B0 inhomogeneities. Within  
4 the optimization range, the same simulated LE of 0.73 was found for Labeling 0, 1, and 2.

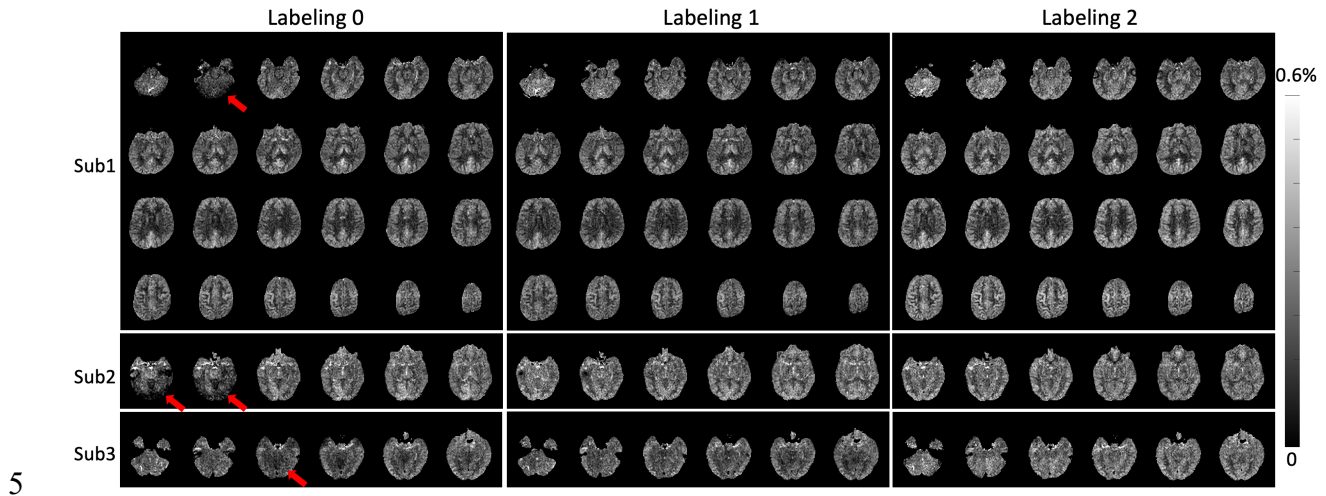

6 **Figure 5.** In-vivo axial slices of  $\Delta M/M0$  maps acquired from 3 subjects. Only the bottom 6 slices  
7 were shown for subject 2 and 3. Severe interference (red arrows) observed in Labeling 0 were  
8 eliminated by Labeling 1 and Labeling 2. Compared to Labeling 1, Labeling 2 showed better  
9 performance, which was consistent with the theoretical analysis and simulation results from Fig.  
10 2 (b). From in-vivo images acquired on the three subjects, no significant difference in LE among  
11 the three labeling parameter sets was found, as evidenced by comparable  $\Delta M/M0$  values.

12 Figure 5 presents in-vivo  $\Delta M/M0$  maps from 3 subjects. With Labeling 0, strong interferences of  
13 dark bands (red arrows) can be observed in the bottom slices. These dark bands disappeared in  
14 the maps of Labeling 1 and 2, suggesting that the proposed labeling parameter sets minimized  
15 interferences. Compared to Labeling 1, Labeling 2 achieved a slightly better suppression because  
16 of a reduced amplitude of higher order sidelobes. In addition, the perfusion signal was high and  
17 uniform in  $\Delta M/M0$  maps without noticeable asymmetrical labeling effects attributed to the  
18 robustness of all labeling parameter sets to field inhomogeneities.  $\Delta M/M0$  in gray matter (GM)  
19 measured from 3 subjects were  $0.24 \pm 0.04$ ,  $0.24 \pm 0.03$ , and  $0.26 \pm 0.06\%$  for Labeling 0, 1, and  
20 2, respectively. White matter (WM)  $\Delta M/M0$  values were  $0.15 \pm 0.02$ ,  $0.16 \pm 0.01$ , and  $0.16 \pm$   
21  $0.03\%$  for Labeling 0, 1, and 2, respectively.

### 1 3.2. Optimization of background suppression pulses

2 Figure 3 (a) presents mean IEs and the associated ranges as the shaded area achieved by the four  
3 BS pulses as a function of relative SAR from the simulation. 3T pulse yielded compromised  
4 performance at 7T with a mean IE of 0.87 and minimal IE of 0.4. With the double BS scheme,  
5 this may reduce the perfusion signal by 25%-80%. Generally, it was difficult to achieve  
6 acceptable performance with a relative SAR < 2. At 2.3-fold SAR, HS achieved a mean IE of  
7 0.92 and a minimal IE of 0.87. At 3.1-fold SAR, MATPULSE achieved a mean IE of 0.94 and a  
8 minimal IE of 0.86. At 3.7-fold SAR, WURST achieved a mean IE of 0.92 and a minimal IE of  
9 0.90. Among all tested pulses, OPTIM achieved the highest mean IE of 0.94 and the highest  
10 minimal IE of 0.92 at the cost of 4.8-fold SAR. In practice, the choice of different BS pulses can  
11 be determined by the maximal allowed SAR and acceptable scan time. The optimized pulses are  
12 presented in Fig. 3 (b-f), and the parameters are listed in supplement section 3.

(a) IE maps

(b)  $\Delta M/M_0$  maps

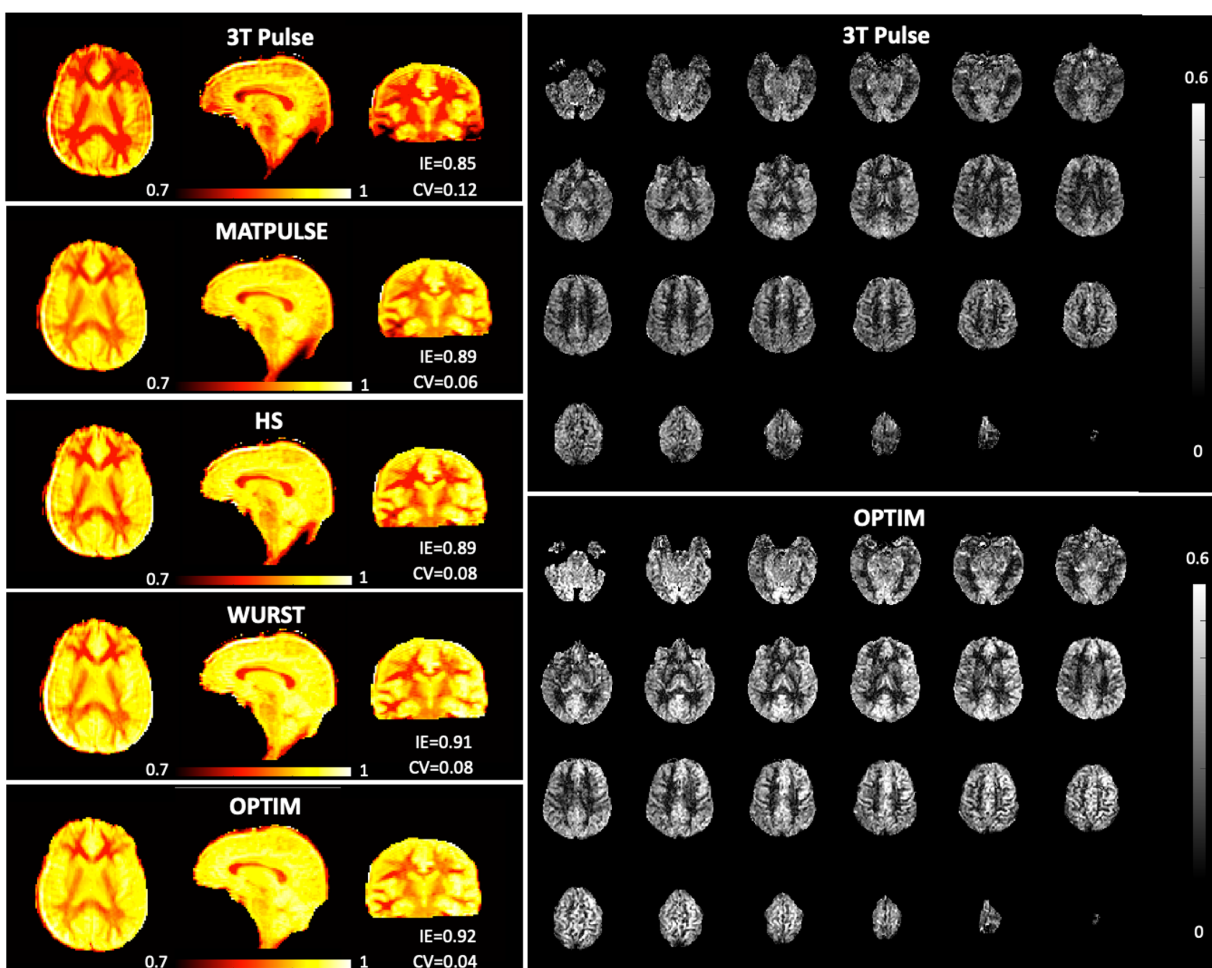

1 **Figure 6.** (a) In-vivo IE maps acquired with a single slice (in all 3 views) 2D TFL readout  
2 immediately following a BS pulse. Optimized pulses achieved higher IE and lower CV than 3T  
3 pulse, where OPTIM offers the best performance. (b) In-vivo  $\Delta M/M_0$  maps acquired with  
4 OPTIM and the 3T pulse. OPTIM offers 33.3% higher perfusion signal and 23.5% higher tSNR  
5 in GM than 3T pulse.

6 Figure 6 compares the optimized pulses with 3T pulse in IE maps and  $\Delta M/M_0$  maps in vivo. It  
7 can be seen that significantly higher and more uniform IEs were achieved by the optimized  
8 pulses compared to 3T pulse. For 3T pulse, MATPULSE, HS, WURST, and OPTIM, mean IE  
9 were 0.85, 0.89, 0.89, 0.91, and 0.92, respectively, and coefficients of variance (CV) were 0.12,  
10 0.06, 0.08, 0.08, and 0.04, respectively. Among optimized pulses, OPTIM offered the best  
11 performance (9.4% IE increase and 66.6% CV decrease compared to 3T pulse). In addition, a  
12 critical deficiency of IE in bottom slices and temporal lobes (red arrow) was caused by the  
13 sensitivity of 3T pulse to field inhomogeneities in inferior regions. The low IE may raise the  
14 concern of substantial loss of perfusion signal and shortening of efficient LD. From  $\Delta M/M_0$   
15 maps, the perfusion signal was significantly higher for OPTIM compared to 3T pulse. As listed  
16 in Table 1, compared to 3T pulse, OPTIM increased GM  $\Delta M/M_0$  by 33.3% from 0.21 to 0.28%  
17 and tSNR by 23.5% from 0.85 to 1.05.

### 18 **3.3. 3D readout**

19 Figure 4 (c) demonstrates the change of FWHM as a function of FA in TFL-pCASL, where  
20 FWHM increased with larger FA and reduced  $N_{\text{seg}}$ . Minimal blurring was introduced in the PE  
21 direction with an FWHM less than 1.1 regardless of  $N_{\text{seg}}$  tested. Nevertheless, more blurring in  
22 partition direction was demonstrated. At FA of 4°, 8°, and 12°, FWHMs were 1.3, 2.7, and 5.1  
23 pixels, respectively, for  $N_{\text{seg}}$  of 2, which were reduced to 1.2, 1.6, and 2.7 pixels, respectively, by  
24 increasing  $N_{\text{seg}}$  to 4. Since SNR increases linearly with larger FA, there is a trade-off between  
25 SNR and through-plane blurring. Although a greater  $N_{\text{seg}}$  eased this trade-off, artifacts related to  
26 motion or physiological fluctuation between segments may arise. Therefore, according to this  
27 simulation, a TFL readout with  $N_{\text{seg}}$  of 2 and FA of 8° may be recommended.

28 Figure 4 (d) shows the PSFs simulated for  $\Delta M$  maps acquired using TFL and GRASE readouts in  
29 the partition direction. No significant blurring was found in PE direction for both methods (see

1 supplement 7). Comparing the two PSFs, the amplitude of TFL was 20% lower than that of  
2 GRASE, and the FWHM of TFL was 2.7 pixels, which was 0.7 pixel wider than that of GRASE.  
3 Simulation results suggested that, with a 9-fold acceleration and the advanced TGV  
4 reconstruction, GRASE may achieve higher SNR and less through-plane smoothness than TFL.

5 Figure 7 (a) and (b) show in-vivo TFL-pCASL  $\Delta M$  maps in axial, coronal, and sagittal views  
6 acquired with different FAs and  $N_{\text{seg}}$ s. Gray scales were adjusted to visualize  $\Delta M$  maps with  
7 different signal levels. The image was noisy, and GM/WM contrast was plain for FA of  $4^\circ$ . By  
8 increasing FA to  $8^\circ$  and  $12^\circ$ , signal amplitudes were doubled and tripled, respectively, resulting  
9 in improvements in SNR and GM/WM contrast. As listed in Table 1, the  $\Delta M$  values of  $4^\circ$  and  $8^\circ$   
10 relative to that of  $12^\circ$  were 0.37 and 0.69, respectively. However, through-plane blurring was  
11 aggravated by increased FA, which was demonstrated by the coronal and sagittal views of the  
12  $\Delta M$  maps in Fig. 7 (a). BQMs measured for FA of  $4^\circ$ ,  $8^\circ$ , and  $12^\circ$  were 0.24, 0.30, and 0.34,  
13 respectively. Similarly, from Fig. 7 (b), more through-plane blurring can be seen in the  $\Delta M$  maps  
14 with  $N_{\text{seg}} = 2$  than that with  $N_{\text{seg}} = 4$ , and the BQMs were 0.32 and 0.28 for  $N_{\text{seg}}$  of 2 and 4,  
15 respectively. However, increasing  $N_{\text{seg}}$  introduced ringing artifacts (red arrows) that might be  
16 related to the motion or physiological fluctuation. In addition, the  $\Delta M$  map with  $N_{\text{seg}}$  of 4 was  
17 noisier than the  $\Delta M$  map with  $N_{\text{seg}}$  of 2 because the number of repetitions was halved. As listed  
18 in Table 1, SNR were 2.63 and 1.26 for  $N_{\text{seg}}$  of 2 and 4, respectively.

(a)  $\Delta M$  maps acquired with different FAs

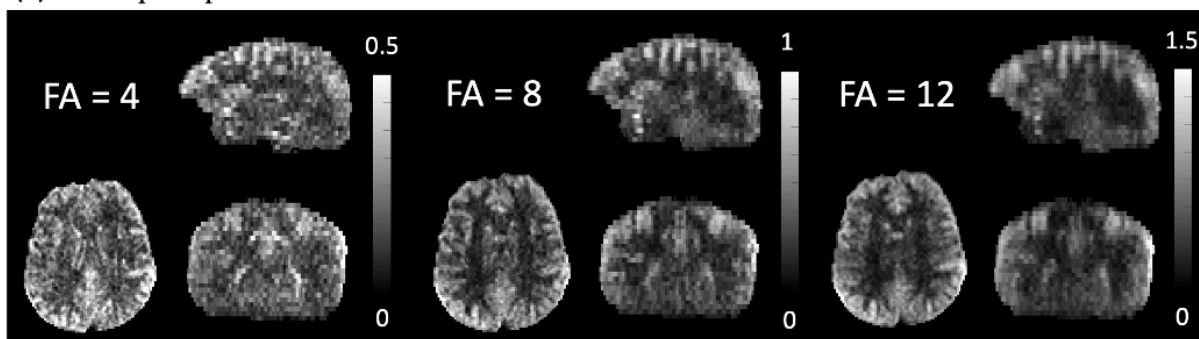

(b)  $\Delta M$  maps acquired with different number of segments

(c)  $\Delta M$  maps acquired with GRASE

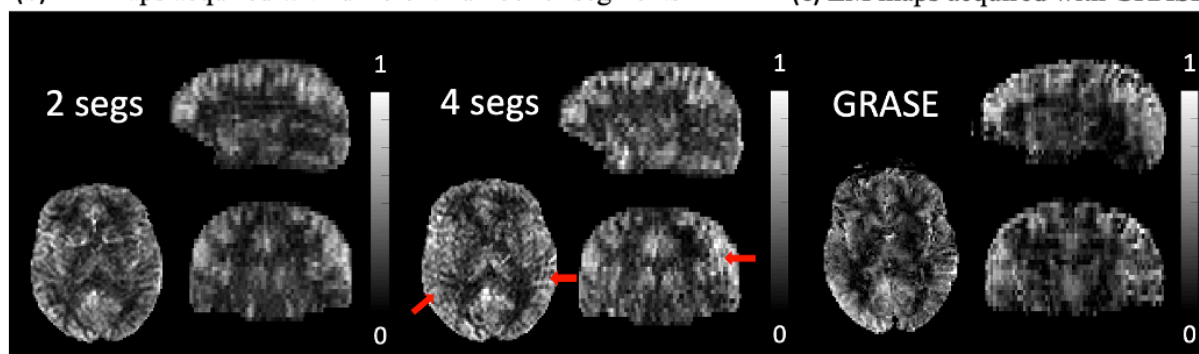

1  
2 **Figure 7.** (a)  $\Delta M$  maps acquired with different FAs demonstrating a trade-off between perfusion  
3 signal intensity and spatial blurring in the partition direction ( $N_{seg} = 2$ ). (b)  $\Delta M$  maps acquired  
4 with different numbers of segments ( $FA = 8^\circ$ ). Despite increased sharpness in the partition  
5 direction, the  $\Delta M$  map acquired with 4 segments had half number of measurements and was  
6 prone to motion-induced artifacts. (c) The  $\Delta M$  map acquired with GRASE on the same subject as  
7 (b). Although SNR and sharpness of GRASE-pCASL were comparable to TFL-pCASL, GRASE-  
8 pCASL suffered from distortion and intensity variations that may compromise its reliability.

9 TFL- and GRASE-pCASL are compared in in-vivo  $\Delta M$  maps in Fig. 7 (b,c) and CBF maps in  
10 Fig. 8. In Fig. 7 (b,c), GRASE-pCASL showed a higher SNR and less through-plane smoothness  
11 compared to TFL-pCASL with  $N_{seg} = 2$ , and a higher SNR but smoother coronal and sagittal  
12 views compared to TFL-pCASL with  $N_{seg} = 4$ . Fig. 8 reveals distortions (red arrows) in regions,  
13 such as lower slices and frontal lobes, in GRASE-pCASL, which were not observed in TFL-  
14 pCASL images. Supplement section 8 shows  $\Delta M/M_0$  maps overlaid on T1w images, where  
15 TFL-pCASL matched T1w images better than GRASE-pCASL, especially in frontal and  
16 temporal regions. Besides, CBF maps in Fig. 8 show abnormal intensity variations in GRASE  
17 images (yellow arrows), probably due to susceptibility artifacts and unresolved aliasing artifacts.

1 Some bright vascular signals can be observed in TFL-pCASL  $\Delta M/M_0$  maps due to arterial transit  
 2 effects. Table 1 reports that the SNRs were  $3.75 \pm 0.08$  and  $5.37 \pm 1.38$  and the BQMs were  
 3  $0.32 \pm 0.01$  and  $0.30 \pm 0.03$  for TFL and GRASE, respectively. Generally, although GRASE-  
 4 pCASL offered better SNR and BQM measurements, distortion-free pCASL images with whole-  
 5 cerebrum coverage and better image quality were achieved by 3D TFL readout. Many  
 6 anatomical features can be easily discerned, such as orbitofrontal cortex, choroid plexus, white  
 7 matter, and cortical gyri. Higher resolution (2 mm isotropic) is possible with reduced SNR (see  
 8 supplement section 9)

9  
 10 **Table 1.** Measurements of perfusion signal and performance metrics with different labeling  
 11 parameters, BS pulses, TFL and GRASE readout

|                      | $\Delta M/M_0$ (%) in GM | $\Delta M/M_0$ (%) in WM |
|----------------------|--------------------------|--------------------------|
| Labeling 0           | $0.24 \pm 0.04$          | $0.15 \pm 0.02$          |
| Labeling 1           | $0.24 \pm 0.03$          | $0.16 \pm 0.01$          |
| Labeling 2           | $0.26 \pm 0.06$          | $0.16 \pm 0.03$          |
|                      | $\Delta M/M_0$ (%) in GM | tSNR                     |
| 3T pulse             | 0.21                     | 0.85                     |
| OPTIM                | 0.28                     | 1.05                     |
|                      | BQM*                     | $\Delta M$ (a.u.)        |
| FA = 4°              | 0.24                     | 0.37                     |
| FA = 8°              | 0.30                     | 0.69                     |
| FA = 12°             | 0.34                     | 1                        |
|                      | BQM*                     | SNR                      |
| N <sub>seg</sub> = 2 | 0.30                     | 2.63                     |
| N <sub>seg</sub> = 4 | 0.27                     | 1.26                     |
|                      | BQM*                     | SNR                      |
| TFL-pCASL            | $0.32 \pm 0.00$          | $3.75 \pm 0.08$          |
| GRASE-pCASL          | $0.30 \pm 0.04$          | $5.37 \pm 1.38$          |
|                      | CBF GM (ml/100g/min)     | CBF WM (ml/100g/min)     |

|                      | Test      | Retest                            | Test     | Retest   |
|----------------------|-----------|-----------------------------------|----------|----------|
| <b>TFL-pCASL</b>     | 35.8±2.7  | 35.1±2.2                          | 20.5±1.4 | 20.5±1.9 |
| <b>GRASE-pCASL</b>   | 38.9±2.2  | 36.3±3.6                          | 24.1±2.4 | 21.7±2.6 |
|                      | SNR       |                                   | tSNR     |          |
| <b>3D TFL-pCASL</b>  | 2.45      |                                   | 1.07     |          |
| <b>SMS-TFL-pCASL</b> | 1.33      |                                   | 0.31     |          |
|                      | SNR       | $\Delta M/M0$ (%) in brain/GM/WM  |          |          |
| <b>7T</b>            | 2.24±0.28 | 0.20±0.02 / 0.24±0.02/ 0.11±0.02  |          |          |
| <b>3T</b>            | 1.58±0.27 | 0.32±0.05 / 0.38±0.06 / 0.19±0.04 |          |          |

\* The blur quality metric (BQM) is a value between 0-1, and a larger value indicates an image is more blurred.

### 1 **3.4. Test-retest repeatability**

2 Figure 8 shows CBF maps of a representative subject in two visits using TFL- and GRASE-  
3 pCASL. Measured CBF values are listed in Table 1. CBF maps of other subjects and scatter plots  
4 of test-retest results of TFL- and GRASE-pCASL are listed in supplement section 10. TFL-  
5 pCASL provided a good to excellent repeatability. For brain, GM, and WM, wsCVs were 3.9%,  
6 4.8%, and 3.6%, and ICCs were 0.64, 0.47, and 0.80, respectively. However, the test-retest  
7 repeatability of GRASE-pCASL was compromised with wsCV of 9.0%, 8.9%, and 12.8%, and

1 ICCs of -0.25, -0.07, and -0.11 for global, GM, and WM, respectively.

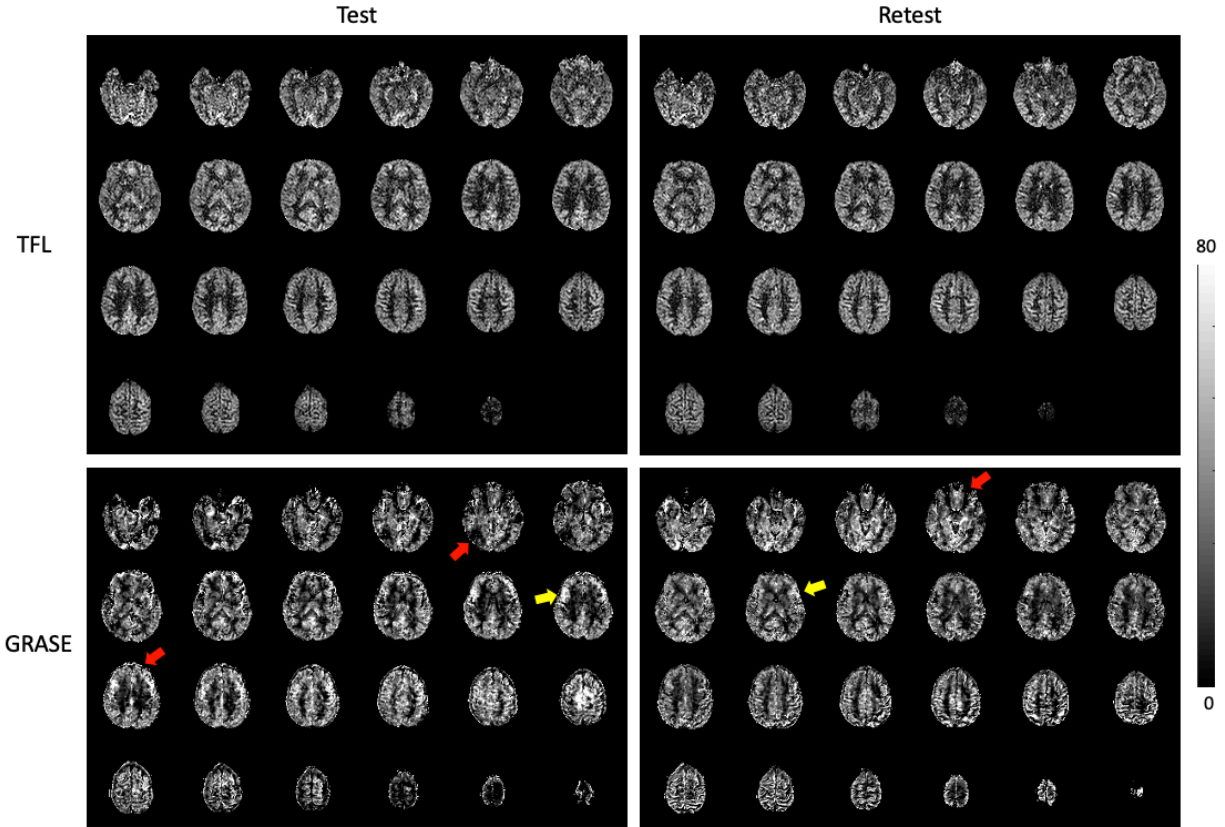

2

3 **Figure 8.** CBF (ml/100g/min) maps of a representative subject in two visits using TFL- and  
4 GRASE-pCASL.

### 5 **3.5. Comparison of 3D and 2D SMS TFL readouts**

6 Figure 9 shows  $\Delta M/M_0$  maps acquired by using SMS-TFL-pCASL and 3D TFL-pCASL. CBF  
7 maps were shown in supplement section 11. Perfusion signal of SMS-TFL-pCASL decayed in  
8 the slice groups (columns) acquired at longer PLDs, while consistent perfusion signal and better  
9 image quality in all slices were observed with 3D TFL-pCASL. SNR was 1.33 and 2.45 for  
10 SMS-TFL-pCASL and 3D TFL-pCASL, respectively. In addition, substantial temporal noise  
11 (see supplement section 11 for SD maps) arose in SMS-TFL-pCASL due to the lack of BS.  
12 tSNRs were 0.31 and 1.07 for SMS-TFL-pCASL and 3D TFL-pCASL, respectively. In addition,  
13 as shown in inset of Fig. 9, slice cross-talk was observed in sagittal and coronal views of SMS-  
14 TFL-pCASL.



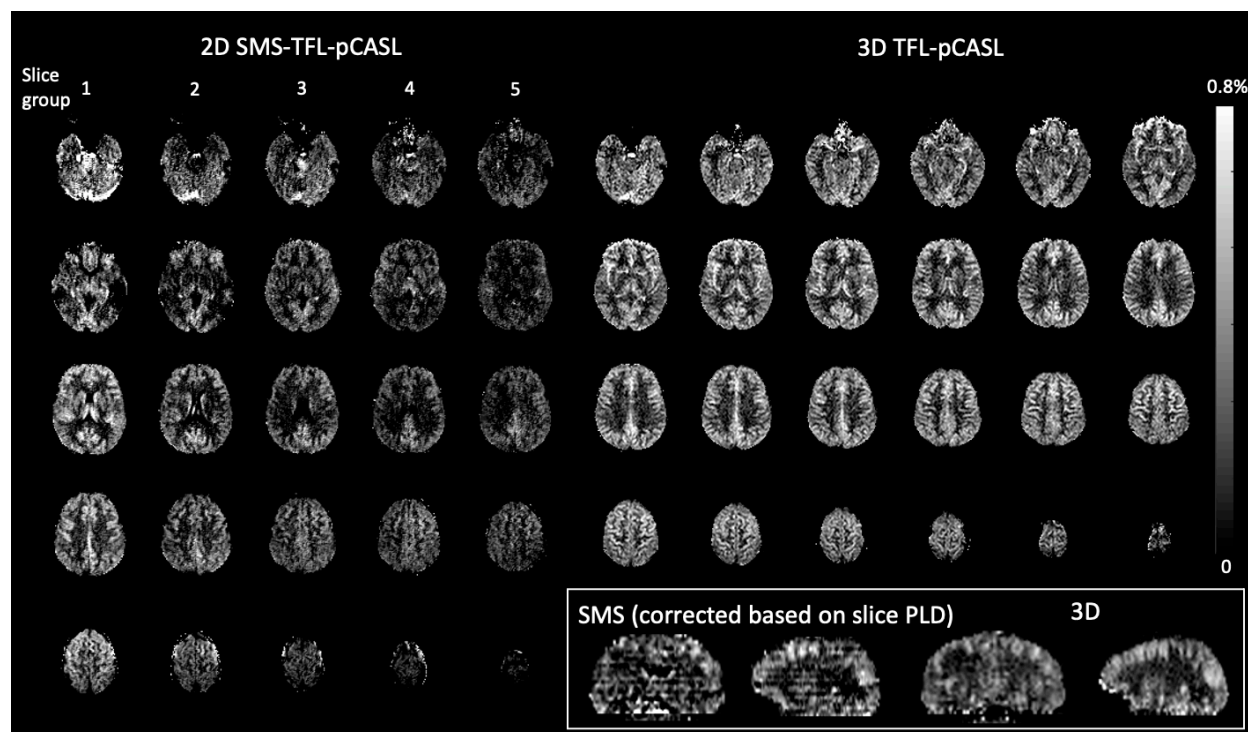

1  
2 **Figure 9.**  $\Delta M/M_0$  maps for a comparison of 2D SMS-TFL-pCASL and 3D TFL-pCASL. The  
3 inset shows the coronal and sagittal views of the two methods.

#### 4 **3.6. Comparison of 3T and 7T TFL-pCASL**

5 Figure 10 shows the CBF maps of a representative subject at 3T and 7T. On average of 5  
6 subjects,  $\Delta M/M_0$  values were  $0.32 \pm 0.05$ ,  $0.38 \pm 0.06$ , and  $0.19 \pm 0.04\%$  at 3T and  $0.20 \pm 0.02$ ,  
7  $0.24 \pm 0.02$ , and  $0.11 \pm 0.02\%$  at 7T in brain, GM, and WM masks, respectively.  $\Delta M/M_0$  values  
8 were lower at 7T as the result of shorter LD and lower  $\alpha$ . Based on Eq. 6,  $\alpha$  at 7T was  $70 \pm 4\%$   
9 relative to that at 3T. However, SNR increased by 42% from  $1.58 \pm 0.27$  to  $2.24 \pm 0.28$  when  
10 comparing 3T and 7T. CBF maps of other subjects can be found in supplement section 12.

1

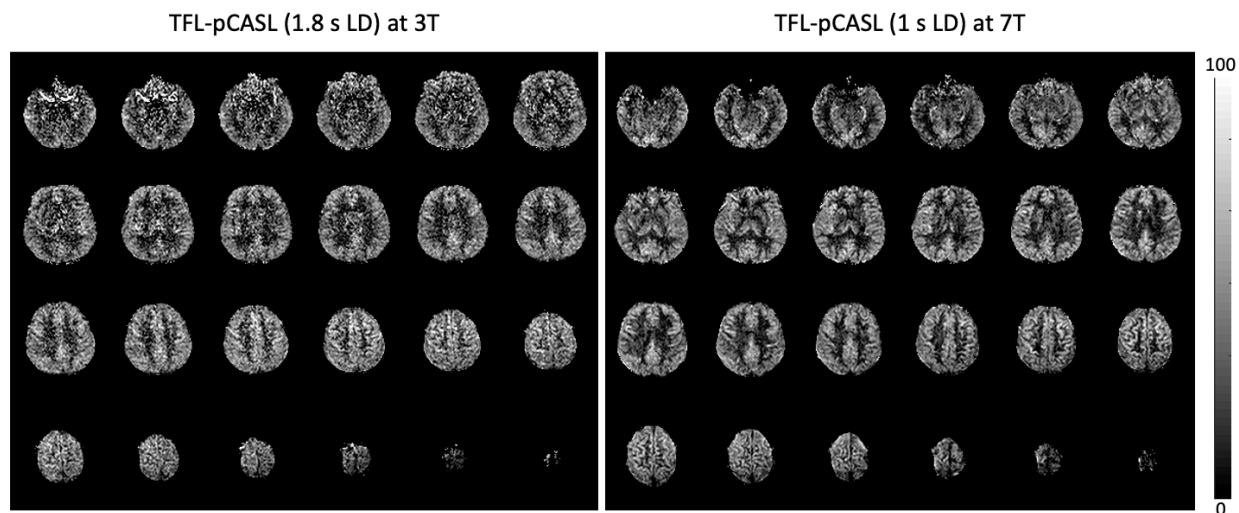

2

3 **Figure 10.** CBF maps (ml/100g/min) acquired with TFL-pCASL at 3T and 7T. While a much  
4 longer LD of 1.8 s was used for 3T TFL-pCASL, 7T TFL-pCASL still shows significant improved  
5 image quality.

## 6 **4. Discussion**

7 In this study, we presented a distortion-free 3D pCASL sequence with whole-cerebrum coverage  
8 at 7T by combining the optimizations of pCASL labeling, BS pulses, and accelerated TFL  
9 readout. The proposed pCASL labeling with  $G_{ave}$  of 0.4 mT/m and  $G_{ratio}$  of 14.67 effectively  
10 achieved whole-cerebrum coverage by removing interferences from bottom slices without  
11 compromising LE. In addition, optimization tailored for the field inhomogeneities at 7T was  
12 conducted for 4 BS pulses, where OPTIM achieved the highest mean IE of 94% and min IE of  
13 92% with a cost of 4.8-fold SAR of the 3T BS pulse. Finally, a 3D TFL readout was presented to  
14 acquire pCASL images with 96 mm coverage and  $2 \times 2 \times 4$  mm<sup>3</sup> resolution. Compared to GRASE,  
15 TFL provided pCASL imaging with comparable SNR and sharpness, no or minimal distortion  
16 with fewer artifacts, and easier co-registration with structural MRI. The feasibility for high  
17 resolution of 2 mm isotropic pCASL imaging and good to excellent test-retest repeatability of the  
18  $2 \times 2 \times 4$  mm<sup>3</sup> protocol were also demonstrated. The proposed TFL-pCASL at 7T also significantly  
19 improved SNR when compared to the same sequence at 3T and SMS-TFL-pCASL at 7T.

#### 1 **4.1. Optimization of labeling parameters**

2 One of the main contributions of the previous work (Wang et al., 2022) for pCASL labeling was  
3 reducing RF spacing and RF duration to minimize the phase accrual between adjacent pulses due  
4 to B0 offset. A lower  $G_{ave}$  was also suggested to compensate for a reduced B1 field in the labeled  
5 neck region at 7T but was unsatisfactory in implementation because of the interference artifacts  
6 in bottom slices. Additionally, a single velocity of 40 cm/s was assumed for the labeled blood,  
7 which might be oversimplistic. In the current study, we presented a new method to address this  
8 artifact and further optimized  $G_{ave}$  and  $G_{ratio}$  with pulsatile and laminar flow. The simulation  
9 yielded Labeling 2 ( $G_{ave} = 0.4$  mT/m and  $G_{ratio} = 14.67$ ) as the optimal parameter set, effectively  
10 eliminating interferences and achieving a comparable LE as the previously proposed Labeling 0  
11 ( $G_{ave} = 0.6$  mT/m and  $G_{ratio} = 10$ ). In addition, a lower  $G_{ave}$  of 0.4 mT/m achieved a higher mean  
12 IE both in simulations and in vivo than the original  $G_{ave}$  of 0.6 mT/m. To mitigate the influence  
13 of B0 offset, compensating gradients during pCASL was also proposed without shortening RF  
14 spacing and RF duration (Saïb et al., 2022). However, this method requires additional pre-scans  
15 and patient-specific adjustments. It should be noted that B0 correction may be necessary in  
16 patients with pathology or metallic implants in the vicinity of the labeling plane

#### 17 **4.2. Optimization of background suppression pulses**

18 Using BS is expensive at 7T in terms of SAR and perfusion signal loss. SAR of the two OPTIM  
19 pulses constituted 27% of the total SAR of the entire sequence. Although it may not be required  
20 for 2D pCASL, BS is necessary for segmented 3D pCASL. As demonstrated in (Alsop et al.,  
21 2015), severe artifacts arose as the result of physiological noise and motion during acquisition  
22 and between segments. Such artifacts may be more concerning at 7T than at 3T as physiological  
23 noise becomes increasingly dominant. Regarding to perfusion signal loss due to BS, we found  
24 that, two 3T BS pulse reduced perfusion signal by 80% in the worst case. After optimization,  
25 OPTIM significantly reduced the loss to <15% but increased SAR of BS by 4.8-fold. Although  
26 the increased SAR led to a longer  $TR_{eff}$ , SNR efficiency was not compromised given the amount  
27 of perfusion signal saved by OPTIM. Alternative methods exist to minimize perfusion signal  
28 loss. First, a single BS scheme could be an option to balance the cost and the gain. However, it is  
29 hard to achieve satisfactory signal suppression while avoiding negative tissue signals, especially  
30 for GM voxels mixing with CSF. Second, a longer LD can compensate for the perfusion signal

1 loss caused by suboptimal BS, for example 1.43 s LD and 3T BS pulse achieve the same SAR as  
2 our current protocol. Nevertheless, OPTIM provides uniform IE across whole brain, which is  
3 critical for avoiding loss of label due to low IE in inferior brain regions. Moreover, our  
4 experiment showed that OPTIM with 1 s LD is already more SNR efficient than 3T BS with 1.43  
5 s LD (supplement section 13). This advantage will be magnified when OPTIM is used with a  
6 longer LD. The proposed sequence with OPTIM reached 70%-90% SAR at the first level with a  
7 TR of 7 s and a total scan time of 11 min 40 s, which might be acceptable for a clinical scan. For  
8 the applications requiring higher temporal resolution, other BS pulses with different  
9 performances and SAR levels optimized in this study might be considered based on specific  
10 needs.

### 11 **4.3. Evaluation of 3D TFL readout**

12 Compared to GRASE, a drawback of TFL is the longer readout duration. In this study, readout  
13 durations were 1344 and 220 ms for TFL and GRASE, respectively. Using a relatively slow TFL  
14 sequence for perfusion imaging is feasible for two reasons: 1. TFL can accurately reflect  
15 perfusion dynamic at the nominal PLD because k-space center is acquired rapidly in early  
16 excitations when centric ordering is used; 2. The assumption that there is no outflow of labeled  
17 blood water is valid according to (Alsop et al., 2015; Zhou et al., 2001). Admittedly, a prolonged  
18 readout duration may decrease SNR efficiency and cause saturation of labeled blood signal.  
19 However, in our study, a TD (at least 0.9 s) was needed for both 3D TFL-pCASL and GRASE-  
20 pCASL to keep SAR levels within the first level. In this case, the SNR efficiency of pCASL was  
21 primarily determined by effective TR, which was limited by SAR, instead of the readout duration.  
22 TFL-pCASL had a lower SAR than GRASE-pCASL in our in-vivo scans and thus a shorter  $TR_{\text{eff}}$ .  
23 We also applied  $2 \times 2$  acceleration and segmented readout ( $N_{\text{seg}}=2$ ) to reduce TFL readout  
24 duration and potential saturation of perfusion signals. Another potential disadvantage of TFL is  
25 the intrinsically lower SNR than GRASE because TFL relies on a small FA while GRASE uses  
26  $FA=90^\circ$ . However, this SNR difference due to FA is decreased by GRASE's demand for high  
27 acceleration factors and high bandwidth to compensate for  $T_2/T_2^*$  relaxation. Also, ASL signal  
28 of GRASE-pCASL is more sensitive to the impact of B1 inhomogeneity on refocusing pulses  
29 than that of TFL-pCASL (see supplement section 14). Our simulation and in-vivo results  
30 indicated 20% (without taking TGV regularization into account) and 40% SNR difference

1 between TFL- and GRASE-pCASL. In addition, there were susceptibility artifacts in GRASE-  
2 pCASL, which potentially contributed to lower ICC and wsCV for GRASE-pCASL compared to  
3 TFL-pCASL. Although the small sample size (N=5) may lead to underestimated ICC and wsCV,  
4 the difference reflected by the measurements was consistent with visual observation of test-retest  
5 CBF maps.

6 Compared to 2D SMS-TFL-pCASL without BS, the proposed 3D TFL-pCASL yielded a higher  
7 SNR as a result of thicker excitation volume (20 mm vs 112 mm), constant PLD, centric ordering  
8 (1<sup>st</sup> excitation has 25% higher perfusion signal than 24<sup>th</sup> excitation), and higher tSNR. Centric  
9 ordering was not feasible for SMS-TFL-pCASL due to spiky signals causing interferences  
10 between slices. While through-plane blurring does not impact SMS-TFL-pCASL, slice cross-talk  
11 had a greater effect on the through-plane image quality of SMS-TFL-pCASL compared to TFL-  
12 pCASL. Still, SMS-TFL-pCASL without BS may be a viable approach when SAR is restricted.

13 Alternative to TFL, integrating balanced steady-state free precession (bSSFP) (Park et al., 2013)  
14 and steady-state free precession (FISP) (Gao et al., 2014) with ASL were explored to enable an  
15 increased SNR and a minimal saturation of the ASL signal. However, the methods may not be  
16 suitable for 7T for two reasons: 1. The banding artifacts could be exacerbated due to B<sub>0</sub>  
17 inhomogeneity; 2. A low T<sub>2</sub>/T<sub>1</sub> ratio of arterial blood may limit the expected SNR gain.  
18 Compared to TFL-pCASL at 3T, TFL-pCASL at 7T provided 42% higher SNR in similar  
19 acquisition time. Given a 0.8 s shorter LD, the improvement achieved by ultrahigh field strength  
20 and our optimization is significant.

#### 21 ***4.4. Limitations and Future Directions***

22 At 7T, parallel transmission (pTx) is an important technique that enables a uniform FA against  
23 inhomogeneous B<sub>1</sub> distribution with static or dynamic shimming (Padormo et al., 2016). Previous  
24 studies tried to improve pCASL labeling, the inversion pulse, and the excitation pulse with pTx  
25 (Cloos et al., 2012; Jang et al., 2018; Meixner et al., 2022; Tong et al., 2020; Wang et al., 2022).  
26 In this study, we only used the TrueForm method, and the problem of B<sub>1</sub> inhomogeneity was  
27 tackled by optimizing the adiabaticities of pCASL labeling and BS pulses. As a result, the SNR  
28 in the bottom slices remained low because the sinc pulse is prone to a reduced B<sub>1</sub>. Currently, the  
29 use of pTx is limited because it remains difficult to predict local SAR using commercial software.

1 To ensure the safety of subjects, the vendor usually applies conservative estimation of SAR  
2 leading to increased scanning time. Future research should take advantage of pTx to fulfill the  
3 potential of 7T for ASL.

4 2D-CAIPIRINHA undersampling and conventional GRAPPA reconstruction were used for the  
5 acquisition in this study. More efficient undersampling schemes, such as Poisson-disk  
6 (Vasanawala et al., 2011) and stack-of-spirals (Munsch et al., 2020; Vidorreta et al., 2017), and  
7 compressed sensing are expected to improve the image quality. Furthermore, the future  
8 exploration of the compatibility between TFL and variable flip angle technique (Atkinson et al.,  
9 1994) might be valuable for avoiding signal saturation and image blurring. Also, TFL- and  
10 GRASE-pCASL were compared using different undersampling pattern and reconstruction  
11 methods. Although this may lead to some bias, it is important to compare both sequences with  
12 the most optimized imaging parameters and reconstruction method. The two sequences with the  
13 same undersampling pattern and GRASE-pCASL with direct inverse FFT reconstruction were  
14 presented in supplement section 15. The results were consistent with the finding in section 3.3.  
15 Furthermore, no distortion correction was performed for GRASE-pCASL images in this paper.  
16 However, as the results of distortion corrected GRASE-pCASL shown in supplement 16,  
17 TOPUP of FSL was effective only for correcting geometric distortion, but had no obvious  
18 improvement on signal loss and susceptibility artifacts.

19 Finally, accurate CBF quantification remains challenging at 7T as  $\alpha$  and physiological  
20 parameters, such as arterial transit time, for different groups of people remain to be determined.  
21 Future study comparing 7T ASL with 3T ASL and PET are needed to derive these parameters  
22 from well-established reference values.

## 23 **5. Conclusion**

24 We presented an optimized pCASL labeling, OPTIM BS pulse, and accelerated 3D TFL readout  
25 for 3D pCASL at 7T. The technique yielded a 3D perfusion scan with whole-cerebrum coverage,  
26 detailed perfusion and anatomical information without distortion, and adequate image quality. Its  
27 clinical value remains to be evaluated in future studies.

## 1 Acknowledgements

2 This work is supported by National Institute of Health (NIH) grant UF1-NS100614, R01-  
3 NS114382, R01-EB032169 and R01-EB028297.

## 4 Conflict of Interest

5 Samantha J. Ma is an employee of Siemens Healthcare.

## 6 Data Availability Statement

7 Experimental data is available upon request at <http://www.loft-lab.org/index-5.html>. The pulse  
8 sequence and reconstruction algorithm described in this work can be requested from the  
9 corresponding author through Siemens C2P (Customer to Peer) and University Southern  
10 California (USC) Material Transfer Agreement (MTA).

## 11 References

- 12 Alsop, D.C., Detre, J.A., Golay, X., Günther, M., Hendrikse, J., Hernandez-Garcia, L., Lu, H.,  
13 MacIntosh, B.J., Parkes, L.M., Smits, M., van Osch, M.J.P., Wang, D.J., Wong, E.C.,  
14 Zaharchuk, G., 2015. Recommended Implementation of Arterial Spin Labeled Perfusion  
15 MRI for Clinical Applications: A consensus of the ISMRM Perfusion Study Group and  
16 the European Consortium for ASL in Dementia. *Magn. Reson. Med.* 73, 102–116.  
17 <https://doi.org/10.1002/mrm.25197>
- 18 Atkinson, D., Brant-Zawadzki, M., Gillan, G., Purdy, D., Laub, G., 1994. Improved MR  
19 angiography: magnetization transfer suppression with variable flip angle excitation and  
20 increased resolution. *Radiology* 190, 890–894.  
21 <https://doi.org/10.1148/radiology.190.3.8115646>
- 22 Bian, W., Tranvinh, E., Tourdias, T., Han, M., Liu, T., Wang, Y., Rutt, B., Zeineh, M.M., 2016.  
23 In Vivo 7T MR Quantitative Susceptibility Mapping Reveals Opposite Susceptibility  
24 Contrast between Cortical and White Matter Lesions in Multiple Sclerosis. *AJNR Am. J.*  
25 *Neuroradiol.* 37, 1808–1815. <https://doi.org/10.3174/ajnr.A4830>
- 26 Bland, J.M., Altman, D.G., 1996. Statistics Notes: Measurement error proportional to the mean.  
27 *BMJ* 313, 106. <https://doi.org/10.1136/bmj.313.7049.106>
- 28 Breuer, F.A., Blaimer, M., Mueller, M.F., Seiberlich, N., Heidemann, R.M., Griswold, M.A.,  
29 Jakob, P.M., 2006. Controlled aliasing in volumetric parallel imaging (2D  
30 CAIPIRINHA). *Magn. Reson. Med.* 55, 549–556. <https://doi.org/10.1002/mrm.20787>

- 1 Cloos, M.A., Boulant, N., Luong, M., Ferrand, G., Giacomini, E., Le Bihan, D., Amadon, A.,  
2 2012. kT-points: Short three-dimensional tailored RF pulses for flip-angle  
3 homogenization over an extended volume. *Magn. Reson. Med.* 67, 72–80.  
4 <https://doi.org/10.1002/mrm.22978>
- 5 Crete, F., Dolmiere, T., Ladret, P., Nicolas, M., 2007. The blur effect: perception and estimation  
6 with a new no-reference perceptual blur metric, in: *Human Vision and Electronic*  
7 *Imaging XII*. Presented at the Human Vision and Electronic Imaging XII, SPIE, pp. 196–  
8 206. <https://doi.org/10.1117/12.702790>
- 9 Dai, W., Garcia, D., de Bazelaire, C., Alsop, D.C., 2008. Continuous flow-driven inversion for  
10 arterial spin labeling using pulsed radio frequency and gradient fields. *Magn. Reson.*  
11 *Med.* 60, 1488–1497. <https://doi.org/10.1002/mrm.21790>
- 12 Detre, J.A., Leigh, J.S., Williams, D.S., Koretsky, A.P., 1992. Perfusion imaging. *Magn. Reson.*  
13 *Med.* 23, 37–45. <https://doi.org/10.1002/mrm.1910230106>
- 14 Feinberg, D.A., Beckett, A., Chen, L., 2013. Arterial spin labeling with simultaneous multi-slice  
15 echo planar imaging. *Magn. Reson. Med.* 70, 1500–1506.  
16 <https://doi.org/10.1002/mrm.24994>
- 17 Gao, Y., Goodnough, C.L., Erokwu, B.O., Farr, G.W., Darrah, R., Lu, L., Dell, K.M., Yu, X.,  
18 Flask, C.A., 2014. Arterial Spin Labeling - Fast Imaging with Steady-State Free  
19 Precession (ASL-FISP): A Rapid and Quantitative Perfusion Technique for High Field  
20 MRI. *NMR Biomed.* 27, 996–1004. <https://doi.org/10.1002/nbm.3143>
- 21 Garcia, D.M., Duhamel, G., Alsop, D.C., 2005. Efficiency of inversion pulses for background  
22 suppressed arterial spin labeling. *Magn. Reson. Med.* 54, 366–372.  
23 <https://doi.org/10.1002/mrm.20556>
- 24 Graf, C., Soellradl, M., Aigner, C.S., Rund, A., Stollberger, R., 2022. Advanced design of MRI  
25 inversion pulses for inhomogeneous field conditions by optimal control. *NMR Biomed.*  
26 35, e4790. <https://doi.org/10.1002/nbm.4790>
- 27 Griswold, M.A., Jakob, P.M., Heidemann, R.M., Nittka, M., Jellus, V., Wang, J., Kiefer, B.,  
28 Haase, A., 2002. Generalized autocalibrating partially parallel acquisitions (GRAPPA).  
29 *Magn. Reson. Med.* 47, 1202–1210. <https://doi.org/10.1002/mrm.10171>
- 30 Hargreaves, B., 2022. *MRSignalsSeqs*.  
31 <https://github.com/IMTtugraz/AVIONIC>, 2022.
- 32 Jang, A., Wu, X., Auerbach, E.J., Garwood, M., 2018. Designing 3D Selective Adiabatic  
33 Radiofrequency Pulses with Single and Parallel Transmission. *Magn. Reson. Med.* 79,  
34 701–710. <https://doi.org/10.1002/mrm.26720>
- 35 Krishnamurthy, L.C., Liu, P., Ge, Y., Lu, H., 2014. Vessel-specific quantification of blood  
36 oxygenation with T2-relaxation-under-phase-contrast MRI. *Magn. Reson. Med.* 71, 978–  
37 989. <https://doi.org/10.1002/mrm.24750>
- 38 Kupce, E., Freeman, R., 1995. Adiabatic Pulses for Wideband Inversion and Broadband  
39 Decoupling. *J. Magn. Reson. A* 115, 273–276. <https://doi.org/10.1006/jmra.1995.1179>
- 40 Luh, W.-M., Talagala, S.L., Li, T.-Q., Bandettini, P.A., 2013. Pseudo-continuous Arterial Spin  
41 Labeling at 7T for Human Brain: Estimation and Correction for Off-resonance Effects  
42 Using a Prescan. *Magn. Reson. Med. Off. J. Soc. Magn. Reson. Med. Soc. Magn. Reson.*  
43 *Med.* 69, 402–410. <https://doi.org/10.1002/mrm.24266>
- 44 Marques, J.P., Kober, T., Krueger, G., van der Zwaag, W., Van de Moortele, P.-F., Gruetter, R.,  
45 2010. MP2RAGE, a self bias-field corrected sequence for improved segmentation and



- 1 T1-mapping at high field. *NeuroImage* 49, 1271–1281.  
2 <https://doi.org/10.1016/j.neuroimage.2009.10.002>
- 3 Matson, G.B., 1994. An integrated program for amplitude-modulated RF pulse generation and  
4 re-mapping with shaped gradients. *Magn. Reson. Imaging* 12, 1205–1225.  
5 [https://doi.org/10.1016/0730-725x\(94\)90086-7](https://doi.org/10.1016/0730-725x(94)90086-7)
- 6 McGraw, K.O., Wong, S.P., 1996. Forming inferences about some intraclass correlation  
7 coefficients. *Psychol. Methods* 1, 30–46. <https://doi.org/10.1037/1082-989X.1.1.30>
- 8 Meixner, C.R., Eisen, C.K., Schmitter, S., Müller, M., Herrler, J., Hensel, B., Dörfler, A., Uder,  
9 M., Nagel, A.M., 2022. Hybrid B1+ -shimming and gradient adaptations for improved  
10 pseudo-continuous arterial spin labeling at 7 Tesla. *Magn. Reson. Med.* 87, 207–219.  
11 <https://doi.org/10.1002/mrm.28982>
- 12 Munsch, F., Taso, M., Zhao, L., Lebel, R.M., Guidon, A., Detre, J.A., Alsop, D.C., 2020.  
13 Rotated spiral RARE for high spatial and temporal resolution volumetric arterial spin  
14 labeling acquisition. *NeuroImage* 223, 117371.  
15 <https://doi.org/10.1016/j.neuroimage.2020.117371>
- 16 Nistler, J., Diehl, D., Renz, W., Eberler, L., 2007. Homogeneity Improvement Using a 2 Port  
17 Birdcage Coil. *Proc. 15th Annu. Meet. ISMRM.*
- 18 Padormo, F., Beqiri, A., Hajnal, J.V., Malik, S.J., 2016. Parallel transmission for ultrahigh-field  
19 imaging. *Nmr Biomed.* 29, 1145–1161. <https://doi.org/10.1002/nbm.3313>
- 20 Park, S.-H., Wang, D.J.J., Duong, T.Q., 2013. Balanced Steady State Free Precession for Arterial  
21 Spin Labeling MRI: Initial Experience for Blood Flow Mapping in Human Brain, Retina,  
22 and Kidney. *Magn. Reson. Imaging* 31, 1044–1050.  
23 <https://doi.org/10.1016/j.mri.2013.03.024>
- 24 Peters, A.M., Brookes, M.J., Hoogenraad, F.G., Gowland, P.A., Francis, S.T., Morris, P.G.,  
25 Bowtell, R., 2007. T2\* measurements in human brain at 1.5, 3 and 7 T. *Magn. Reson.*  
26 *Imaging* 25, 748–753. <https://doi.org/10.1016/j.mri.2007.02.014>
- 27 Rund, A., Aigner, C.S., Kunisch, K., Stollberger, R., 2018. Simultaneous multislice refocusing  
28 via time optimal control. *Magn. Reson. Med.* 80, 1416–1428.  
29 <https://doi.org/10.1002/mrm.27124>
- 30 Saïb, G., Koretsky, A.P., Talagala, S.L., 2022. Optimization of pseudo-continuous arterial spin  
31 labeling using off-resonance compensation strategies at 7T. *Magn. Reson. Med.* 87,  
32 1720–1730. <https://doi.org/10.1002/mrm.29070>
- 33 Schloegl, M., Holler, M., Schwarzl, A., Bredies, K., Stollberger, R., 2017. Infimal convolution of  
34 total generalized variation functionals for dynamic MRI. *Magn. Reson. Med.* 78, 142–  
35 155. <https://doi.org/10.1002/mrm.26352>
- 36 Setsompop, K., Gagoski, B.A., Polimeni, J.R., Witzel, T., Wedeen, V.J., Wald, L.L., 2012.  
37 Blipped-controlled aliasing in parallel imaging for simultaneous multislice echo planar  
38 imaging with reduced g-factor penalty. *Magn. Reson. Med.* 67, 1210–1224.  
39 <https://doi.org/10.1002/mrm.23097>
- 40 Shao, X., Guo, F., Shou, Q., Wang, K., Jann, K., Yan, L., Toga, A.W., Zhang, P., Wang, D.J.J.,  
41 2021. Laminar perfusion imaging with zoomed arterial spin labeling at 7 Tesla.  
42 *NeuroImage* 245, 118724. <https://doi.org/10.1016/j.neuroimage.2021.118724>
- 43 Shao, X., Spann, S.M., Wang, K., Yan, L., Rudolf, S., Wang, D.J.J., 2020. High-resolution  
44 whole brain ASL perfusion imaging at 7T with 12-fold acceleration and spatial-temporal  
45 regularized reconstruction. *Proc. 28th Annu. Meet. ISMRM.*

- 1 Shao, X., Wang, Y., Moeller, S., Wang, D.J.J., 2018. A constrained slice-dependent background  
2 suppression scheme for simultaneous multislice pseudo-continuous arterial spin labeling.  
3 *Magn. Reson. Med.* 79, 394–400. <https://doi.org/10.1002/mrm.26643>
- 4 Silver, M.S., Joseph, R.I., Hoult, D.I., 1984. Highly selective  $\pi/2$  and  $\pi$  pulse generation. *J. Magn.*  
5 *Reson.* 1969 59, 347–351. [https://doi.org/10.1016/0022-2364\(84\)90181-1](https://doi.org/10.1016/0022-2364(84)90181-1)
- 6 Spann, S.M., Kazimierski, K.S., Aigner, C.S., Kraiger, M., Bredies, K., Stollberger, R., 2017.  
7 Spatio-temporal TGV denoising for ASL perfusion imaging. *NeuroImage* 157, 81–96.  
8 <https://doi.org/10.1016/j.neuroimage.2017.05.054>
- 9 Spann, S.M., Shao, X., Wang, D.J., Aigner, C.S., Schloegl, M., Bredies, K., Stollberger, R.,  
10 2020. Robust single-shot acquisition of high resolution whole brain ASL images by  
11 combining time-dependent 2D CAIPIRINHA sampling with spatio-temporal TGV  
12 reconstruction. *NeuroImage* 206, 116337.  
13 <https://doi.org/10.1016/j.neuroimage.2019.116337>
- 14 Tong, Y., Jezzard, P., Okell, T.W., Clarke, W.T., 2020. Improving PCASL at ultra-high field  
15 using a VERSE-guided parallel transmission strategy. *Magn. Reson. Med.* 84, 777–786.  
16 <https://doi.org/10.1002/mrm.28173>
- 17 Vasanaawala, S., Murphy, M., Alley, M., Lai, P., Keutzer, K., Pauly, J., Lustig, M., 2011.  
18 PRACTICAL PARALLEL IMAGING COMPRESSED SENSING MRI: SUMMARY  
19 OF TWO YEARS OF EXPERIENCE IN ACCELERATING BODY MRI OF  
20 PEDIATRIC PATIENTS. *Proc. IEEE Int. Symp. Biomed. Imaging Nano Macro IEEE*  
21 *Int. Symp. Biomed. Imaging* 2011, 1039–1043.  
22 <https://doi.org/10.1109/ISBI.2011.5872579>
- 23 Vidorreta, M., Wang, Z., Chang, Y.V., Wolk, D.A., Fernández-Seara, M.A., Detre, J.A., 2017.  
24 Whole-brain background-suppressed pCASL MRI with 1D-accelerated 3D RARE Stack-  
25 Of-Spirals readout. *PLOS ONE* 12, e0183762.  
26 <https://doi.org/10.1371/journal.pone.0183762>
- 27 Wang, K., Ma, S.J., Shao, X., Zhao, C., Shou, Q., Yan, L., Wang, D.J.J., 2022. Optimization of  
28 pseudo-continuous arterial spin labeling at 7T with parallel transmission B1 shimming.  
29 *Magn. Reson. Med.* 87, 249–262. <https://doi.org/10.1002/mrm.28988>
- 30 Wang, K., Shao, X., Yan, L., Ma, S.J., Jin, J., Wang, D.J.J., 2021. Optimization of adiabatic  
31 pulses for pulsed arterial spin labeling at 7 tesla: Comparison with pseudo-continuous  
32 arterial spin labeling. *Magn. Reson. Med.* 85, 3227–3240.  
33 <https://doi.org/10.1002/mrm.28661>
- 34 Wang, Y., Moeller, S., Li, X., Vu, A.T., Krasileva, K., Ugurbil, K., Yacoub, E., Wang, D.J.J.,  
35 2015. Simultaneous multi-slice Turbo-FLASH imaging with CAIPIRINHA for whole  
36 brain distortion-free pseudo-continuous arterial spin labeling at 3 and 7T. *NeuroImage*  
37 113, 279–288. <https://doi.org/10.1016/j.neuroimage.2015.03.060>
- 38 Weigel, M., 2015. Extended phase graphs: dephasing, RF pulses, and echoes - pure and simple.  
39 *J. Magn. Reson. Imaging JMRI* 41, 266–295. <https://doi.org/10.1002/jmri.24619>
- 40 Williams, D.S., Detre, J.A., Leigh, J.S., Koretsky, A.P., 1992. Magnetic resonance imaging of  
41 perfusion using spin inversion of arterial water. *Proc. Natl. Acad. Sci. U. S. A.* 89, 212–  
42 216. <https://doi.org/10.1073/pnas.89.1.212>
- 43 Zhang, X., Petersen, E.T., Ghariq, E., De Vis, J.B., Webb, A.G., Teeuwisse, W.M., Hendrikse,  
44 J., van Osch, M.J.P., 2013. In vivo blood T1 measurements at 1.5 T, 3 T, and 7 T. *Magn.*  
45 *Reson. Med.* 70, 1082–1086. <https://doi.org/10.1002/mrm.24550>

- 1 Zhao, L., Vidorreta, M., Soman, S., Detre, J.A., Alsop, D.C., 2017. Improving the Robustness of  
2 Pseudo Continuous Arterial Spin Labeling to Off Resonance and Pulsatile Flow Velocity.  
3 Magn. Reson. Med. 78, 1342–1351. <https://doi.org/10.1002/mrm.26513>
- 4 Zhou, J., Wilson, D.A., Ulatowski, J.A., Traystman, R.J., van Zijl, P.C., 2001. Two-compartment  
5 exchange model for perfusion quantification using arterial spin tagging. J. Cereb. Blood  
6 Flow Metab. Off. J. Int. Soc. Cereb. Blood Flow Metab. 21, 440–455.  
7 <https://doi.org/10.1097/00004647-200104000-00013>
- 8 Zuo, Z., Wang, R., Zhuo, Y., Xue, R., Lawrence, K.S.S., Wang, D.J.J., 2013. Turbo-FLASH  
9 Based Arterial Spin Labeled Perfusion MRI at 7 T. PLOS ONE 8, e66612.  
10 <https://doi.org/10.1371/journal.pone.0066612>

11
